# Supplementary material
Source: PubMed Central journal article supplement (PMC2888241)
Supplement: 00932.2009_1.pdf [file 00932.2009_1.pdf]

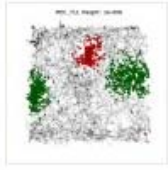

input\_cell\_043.png

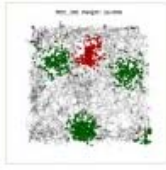

input\_cell\_044.png

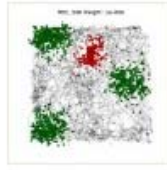

input\_cell\_045.png

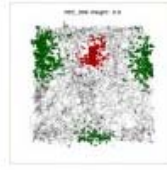

input\_cell\_046.png

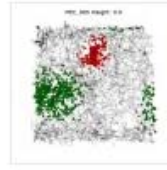

input\_cell\_047.png

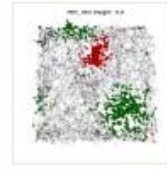

input\_cell\_048.png

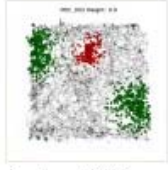

input\_cell\_049.png

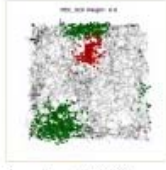

input\_cell\_050.png

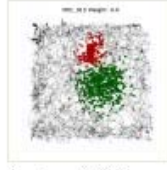

input\_cell\_051.png

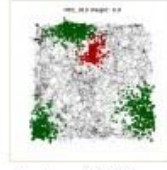

input\_cell\_052.png

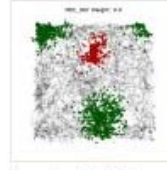

input\_cell\_053.png

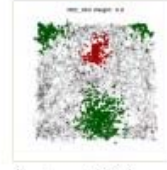

input\_cell\_054.png

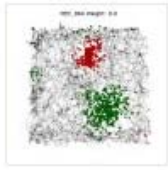

input\_cell\_055.png

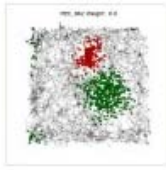

input\_cell\_056.png

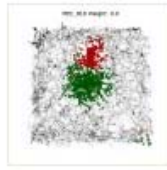

input\_cell\_057.png

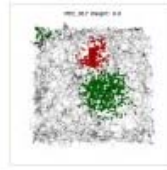

input\_cell\_058.png

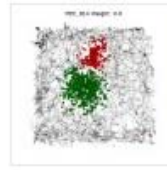

input\_cell\_059.png

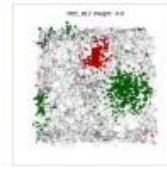

input\_cell\_060.png

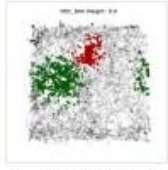

input\_cell\_061.png

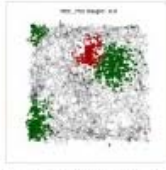

input\_cell\_062.png

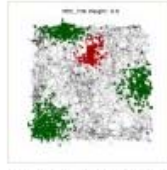

input\_cell\_063.png

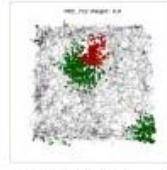

input\_cell\_064.png

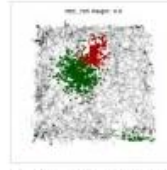

input\_cell\_065.png

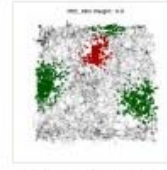

input\_cell\_066.png

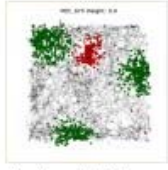

input\_cell\_067.png

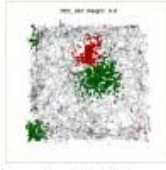

input\_cell\_068.png

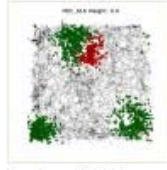

input\_cell\_069.png

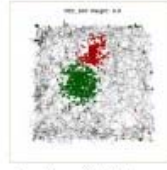

input\_cell\_070.png

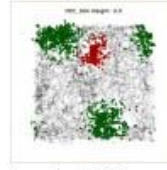

input\_cell\_071.png

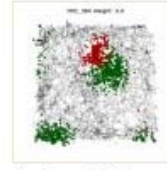

input\_cell\_072.png

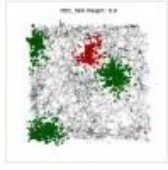

input\_cell\_073.png

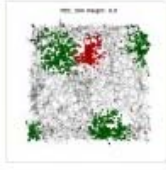

input\_cell\_074.png

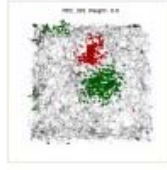

input\_cell\_075.png

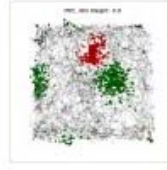

input\_cell\_076.png

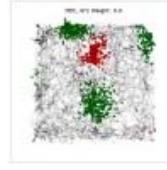

input\_cell\_077.png

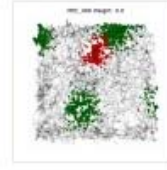

input\_cell\_078.png

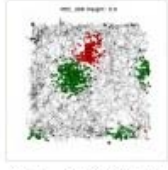

input\_cell\_079.png

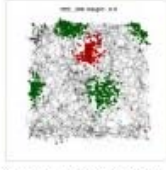

input\_cell\_080.png

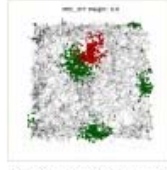

input\_cell\_081.png

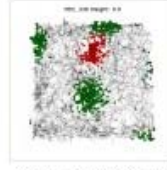

input\_cell\_082.png

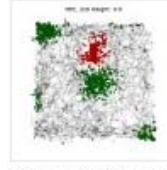

input\_cell\_083.png

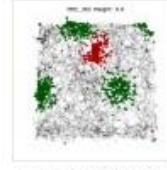

input\_cell\_084.png

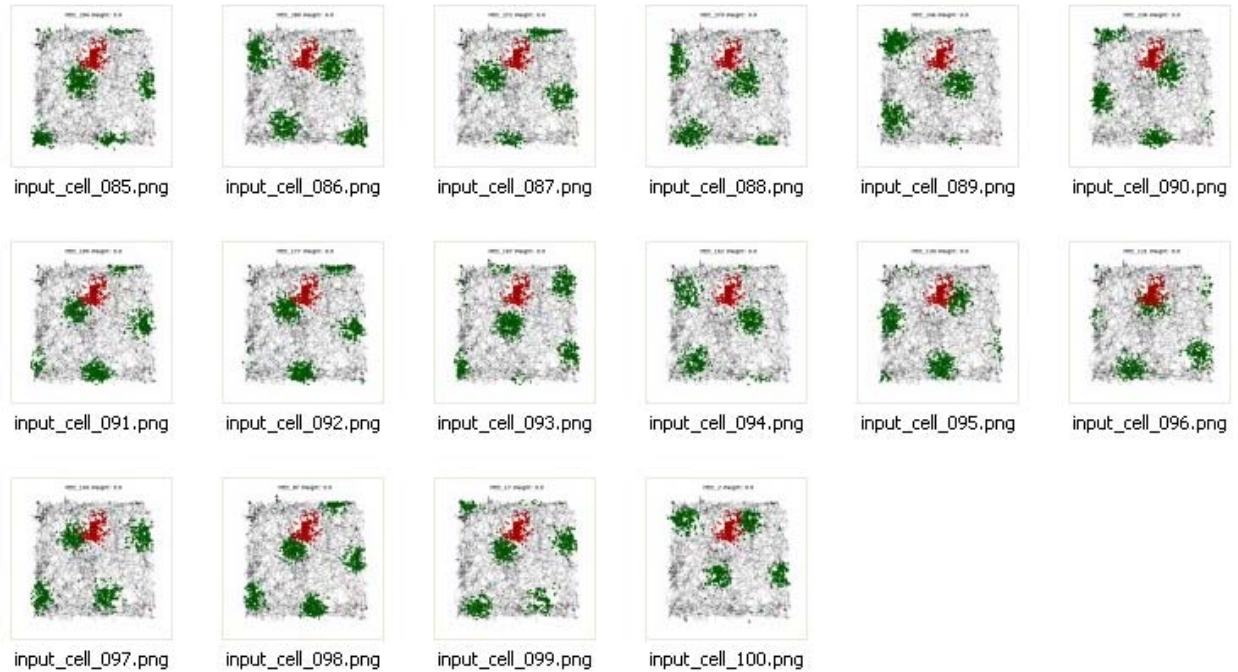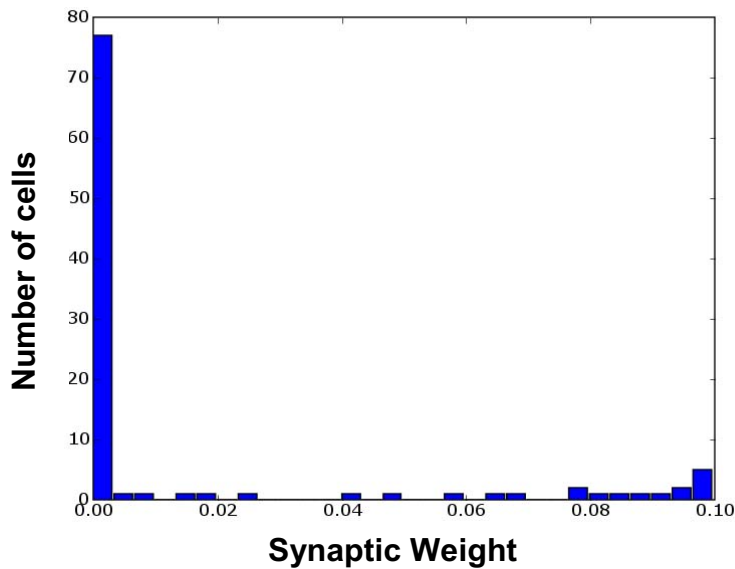

Supplementary Figure 1. Synaptic pattern developed by cell 36 at the end of Simulation 1. This simulation is described in the text and in Figures 2, 3, and 6. (A) Each plot corresponds to one of the 100 grid inputs. The grey line denotes the rat's foraging trajectory over the whole 15-min session (identical across all plots). The green dots denote the locations of the input spikes. The red dots denote the locations of the spikes generated by the output cell (identical across all plots). Grid cells are ordered (from high to low) based on the final strength of the synaptic weight onto the place cell. Inputs that finished the simulation with high weights were those in which one vertex overlapped the place field of the output cell. The remaining inputs, for which the place field typically occurred between vertices, were depressed. (B) The histogram represents the final distribution of synaptic weights ranging from 0 to the saturation limit ( $0.1 \mu\text{S}$ ).

## Supplementary Figure 2

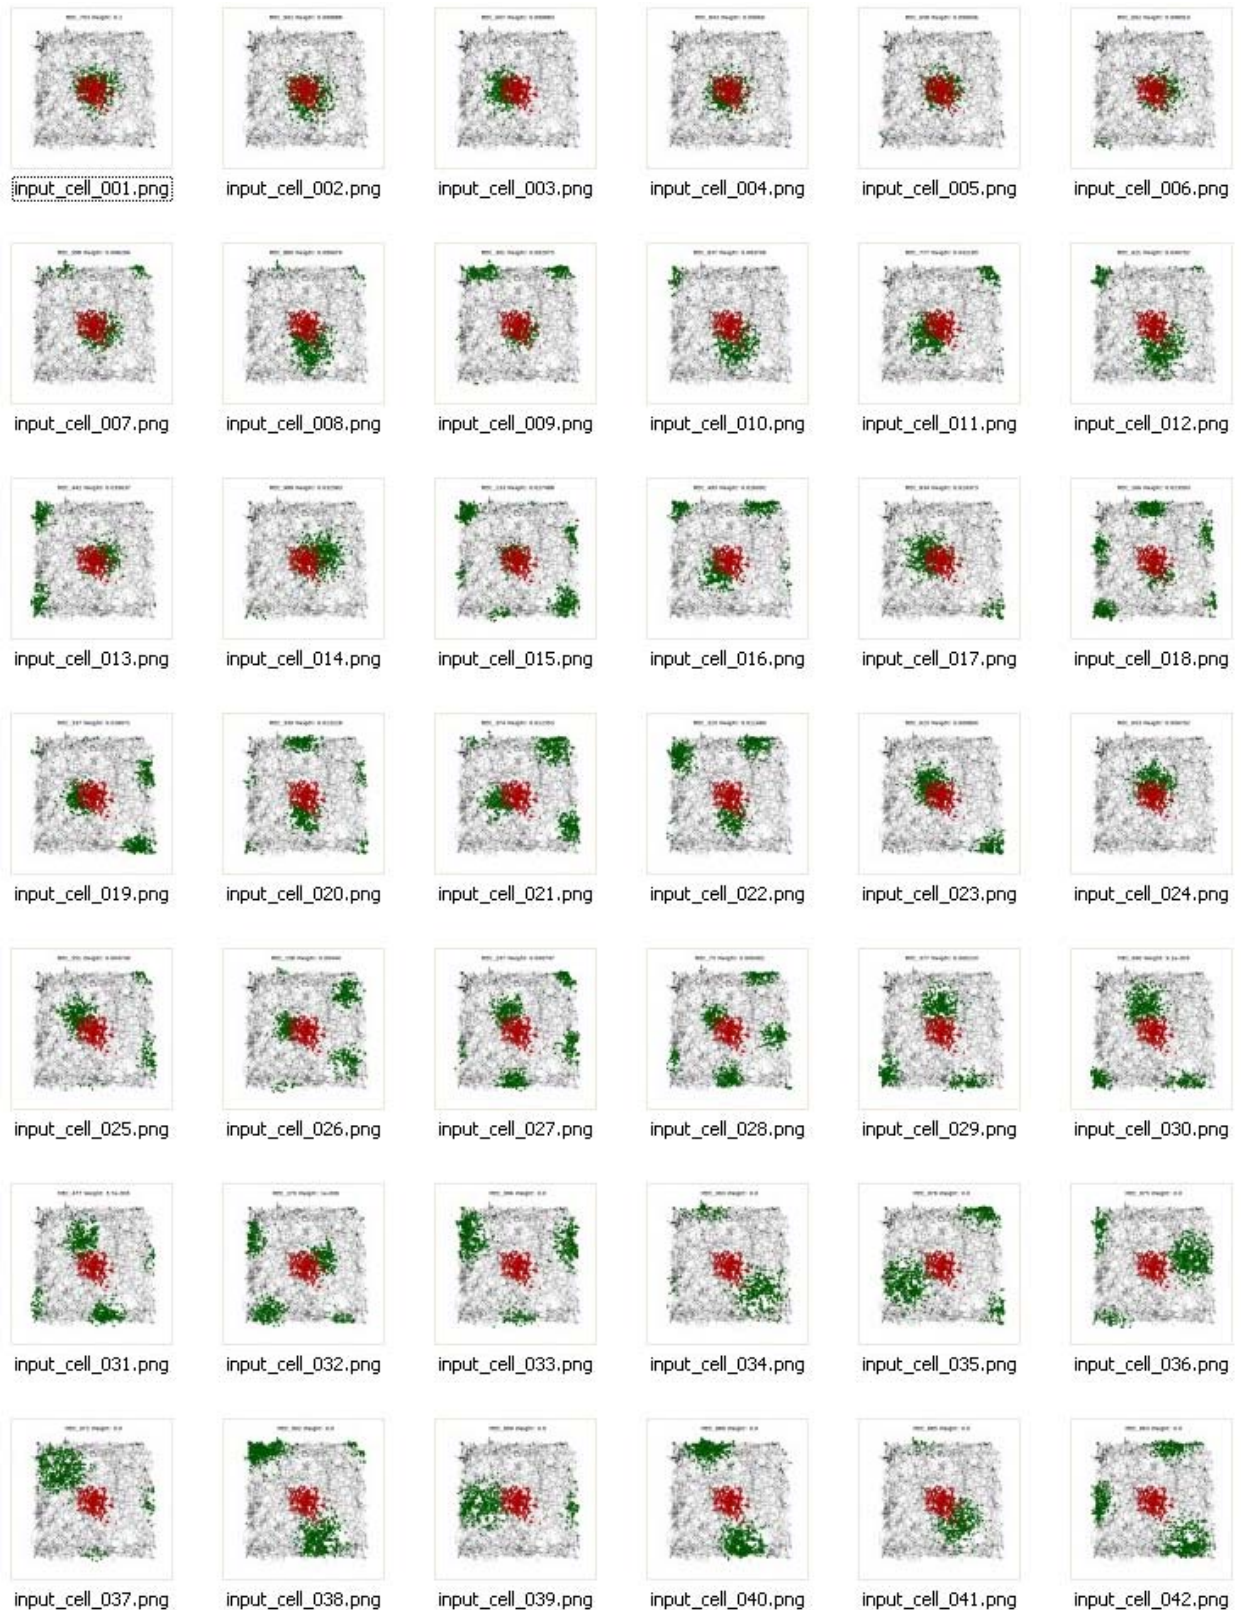

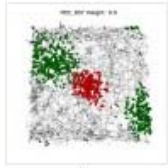

input\_cell\_043.png

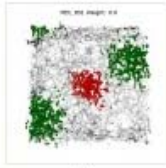

input\_cell\_044.png

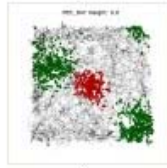

input\_cell\_045.png

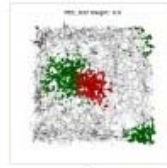

input\_cell\_046.png

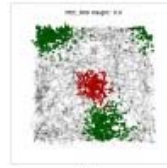

input\_cell\_047.png

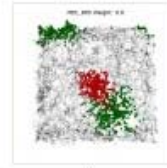

input\_cell\_048.png

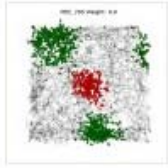

input\_cell\_049.png

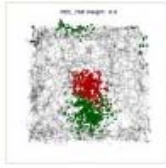

input\_cell\_050.png

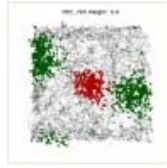

input\_cell\_051.png

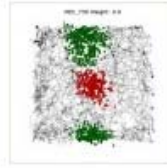

input\_cell\_052.png

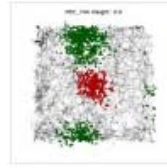

input\_cell\_053.png

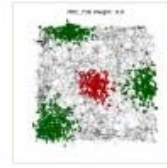

input\_cell\_054.png

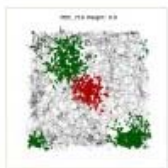

input\_cell\_055.png

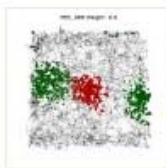

input\_cell\_056.png

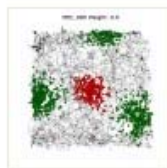

input\_cell\_057.png

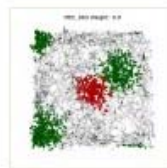

input\_cell\_058.png

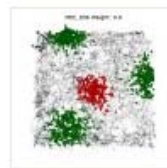

input\_cell\_059.png

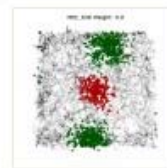

input\_cell\_060.png

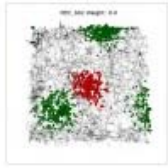

input\_cell\_061.png

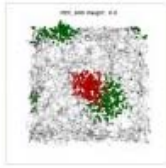

input\_cell\_062.png

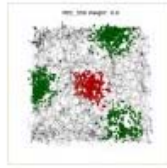

input\_cell\_063.png

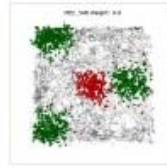

input\_cell\_064.png

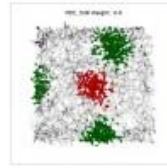

input\_cell\_065.png

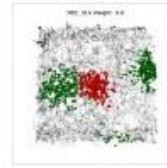

input\_cell\_066.png

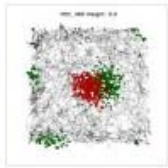

input\_cell\_067.png

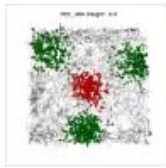

input\_cell\_068.png

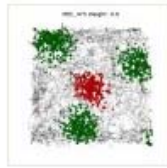

input\_cell\_069.png

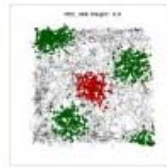

input\_cell\_070.png

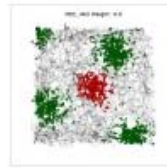

input\_cell\_071.png

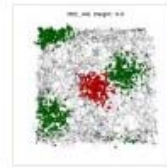

input\_cell\_072.png

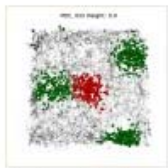

input\_cell\_073.png

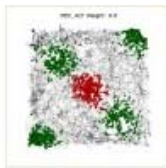

input\_cell\_074.png

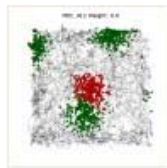

input\_cell\_075.png

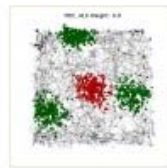

input\_cell\_076.png

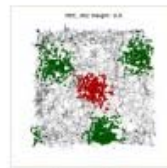

input\_cell\_077.png

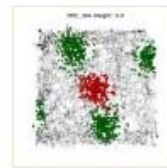

input\_cell\_078.png

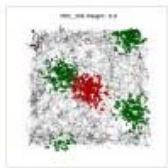

input\_cell\_079.png

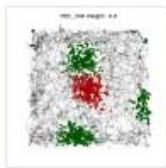

input\_cell\_080.png

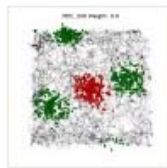

input\_cell\_081.png

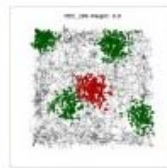

input\_cell\_082.png

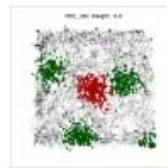

input\_cell\_083.png

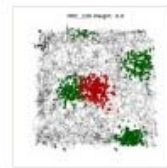

input\_cell\_084.png

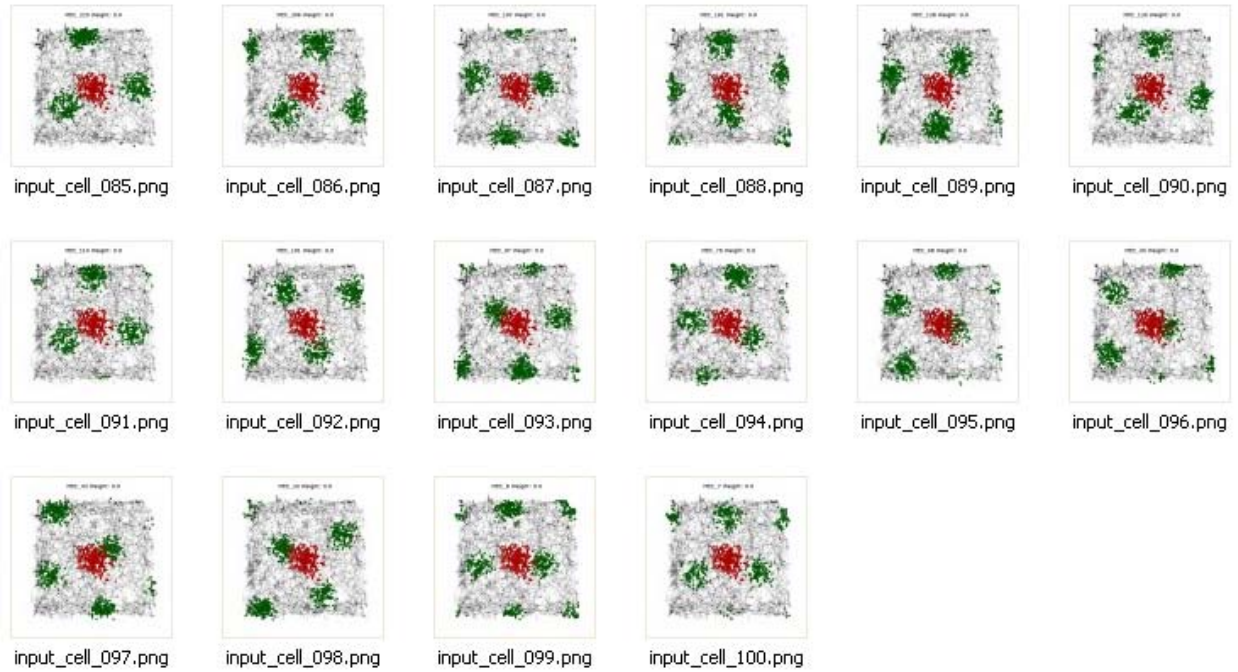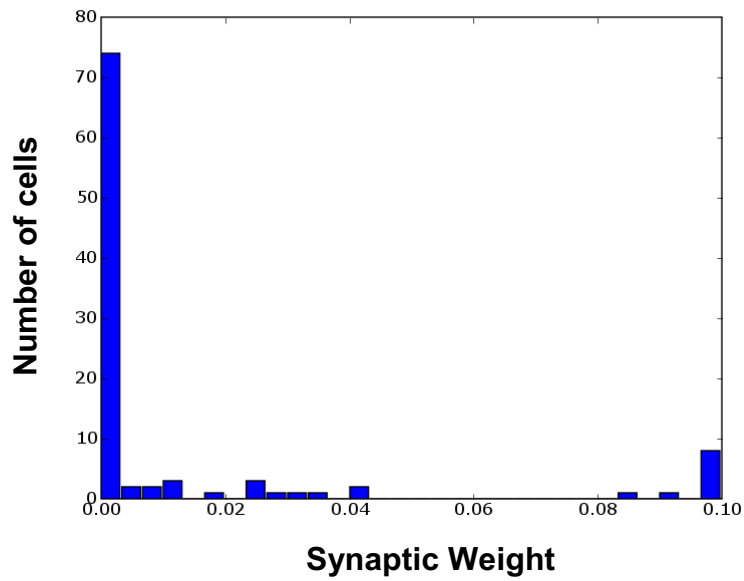

Supplementary Figure 2. Synaptic pattern developed by cell 92 at the end of Simulation 1. (See Supplementary Fig. 1 for legend). These are the same cell and simulation as in Fig. 2.







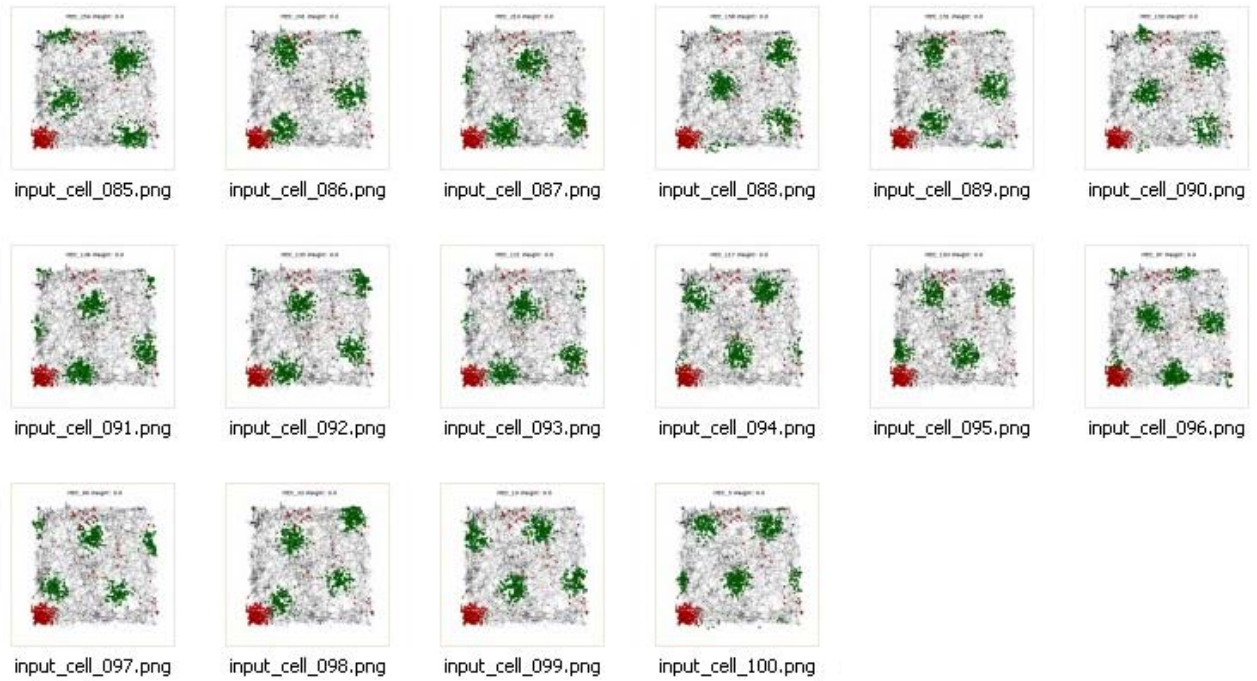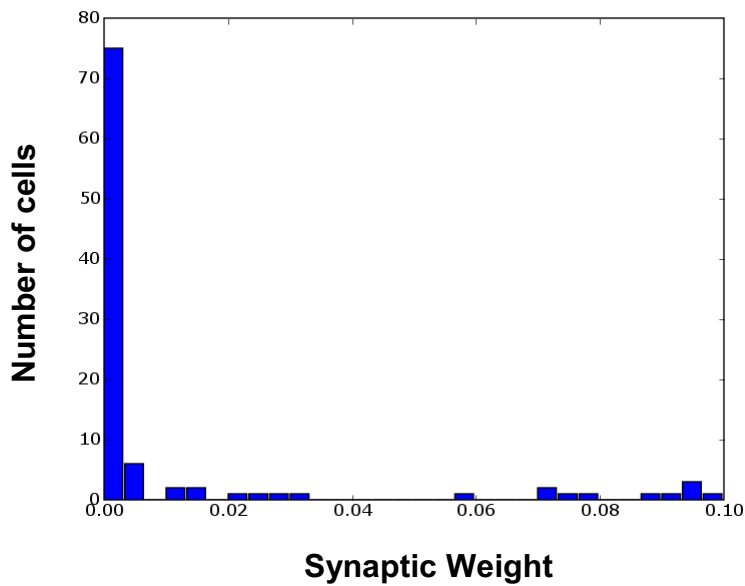

Supplementary Figure 3. Synaptic pattern developed by cell 99 at the end of Simulation 1. (See Supplementary Fig. 1 for legend).

Supplementary Figure 4

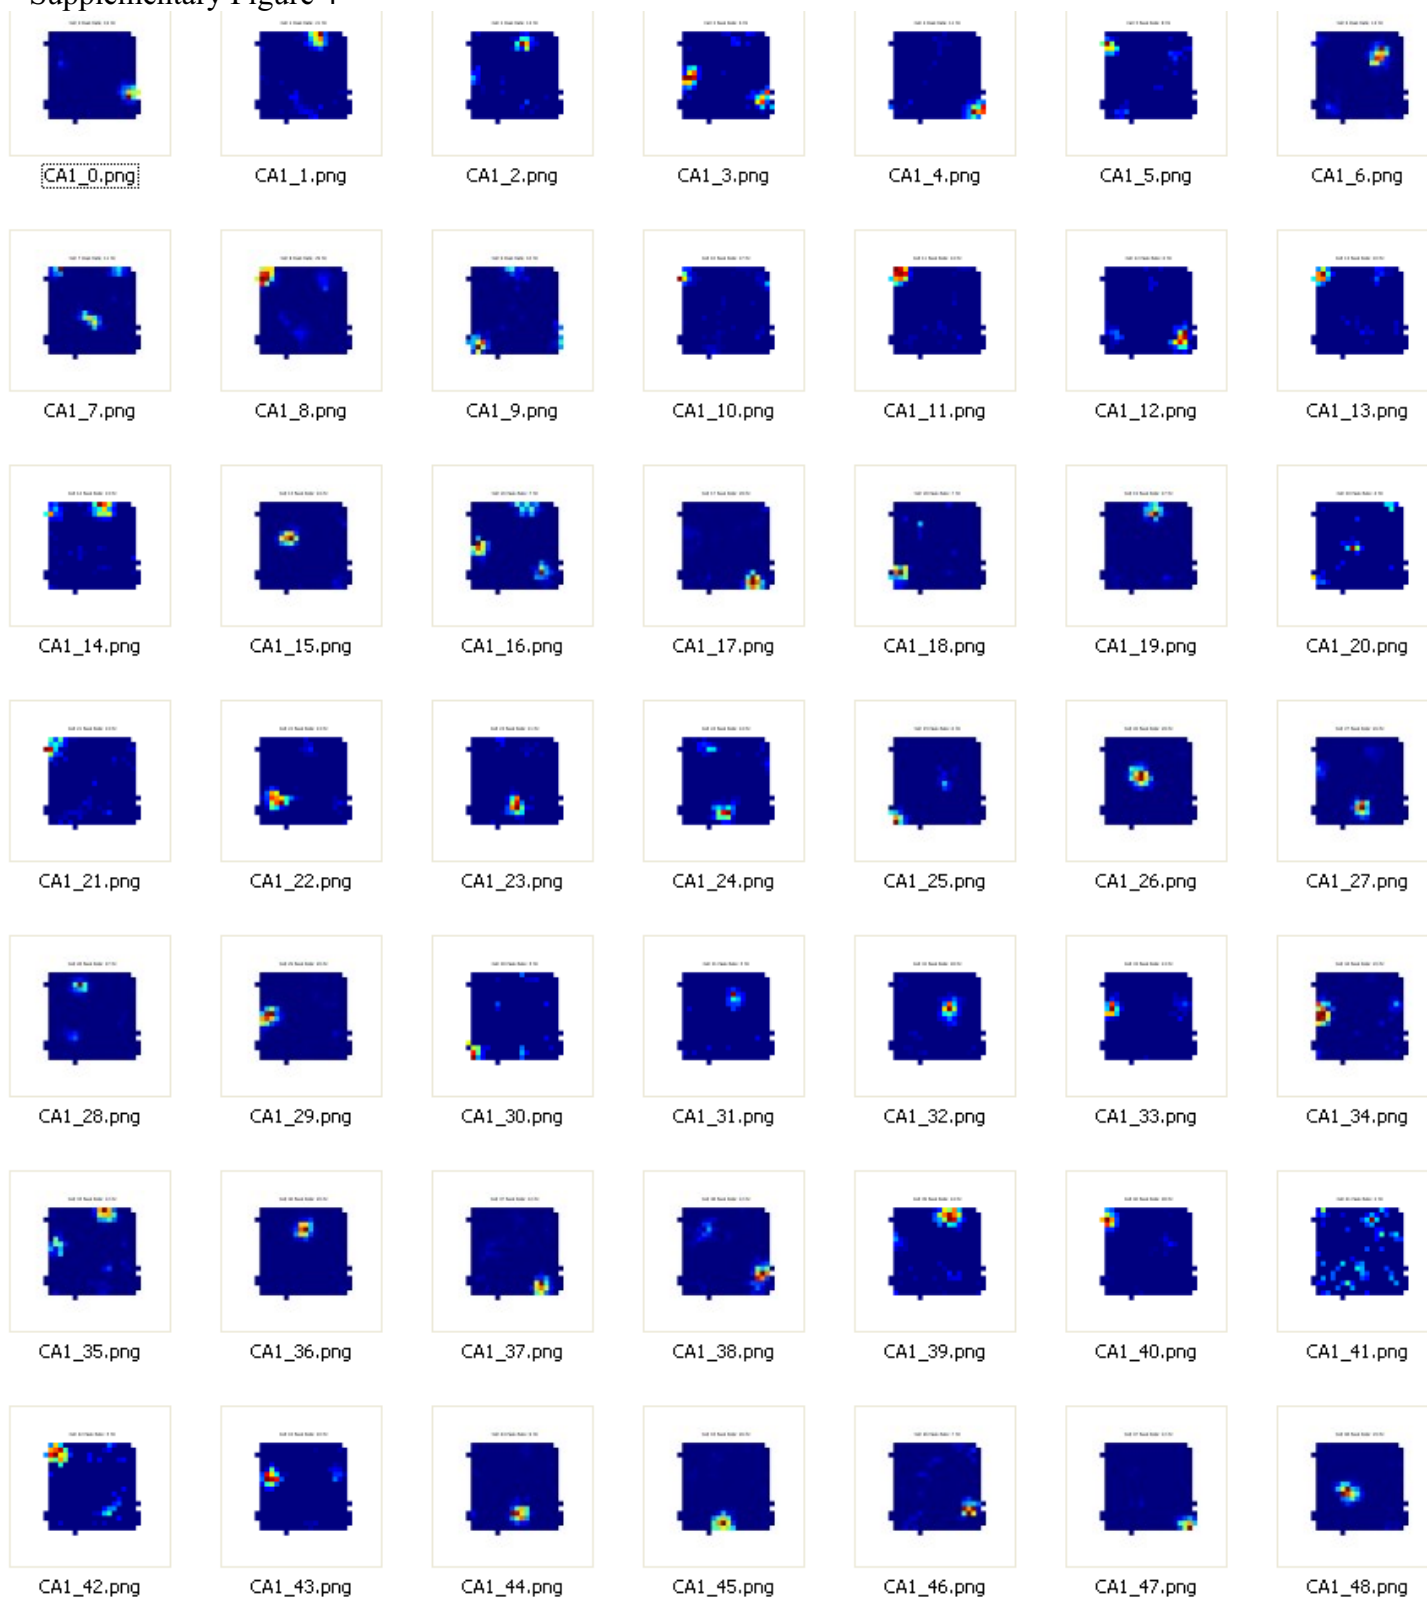

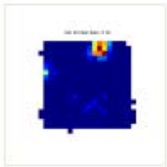

CA1\_49.png

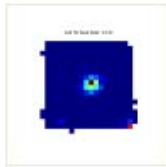

CA1\_50.png

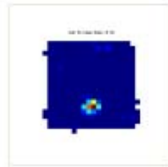

CA1\_51.png

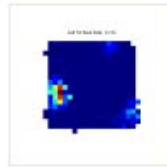

CA1\_52.png

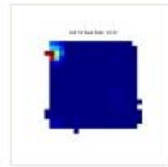

CA1\_53.png

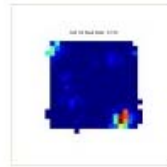

CA1\_54.png

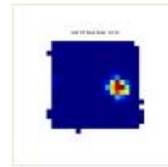

CA1\_55.png

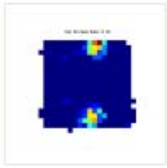

CA1\_56.png

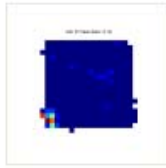

CA1\_57.png

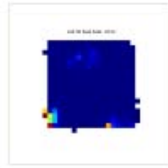

CA1\_58.png

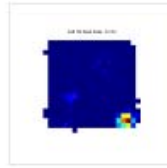

CA1\_59.png

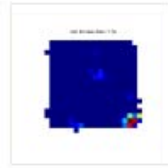

CA1\_60.png

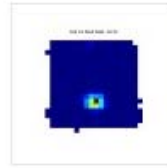

CA1\_61.png

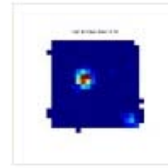

CA1\_62.png

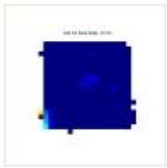

CA1\_63.png

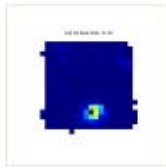

CA1\_64.png

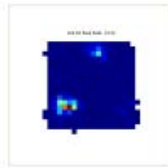

CA1\_65.png

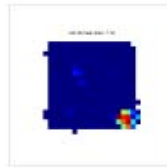

CA1\_66.png

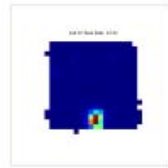

CA1\_67.png

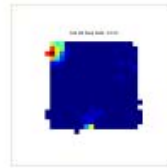

CA1\_68.png

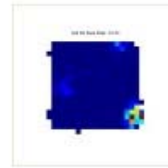

CA1\_69.png

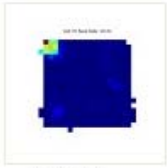

CA1\_70.png

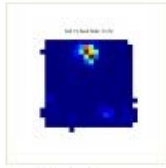

CA1\_71.png

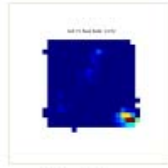

CA1\_72.png

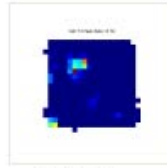

CA1\_73.png

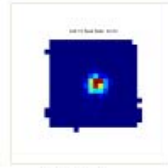

CA1\_74.png

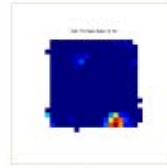

CA1\_75.png

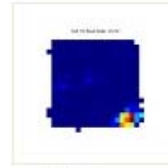

CA1\_76.png

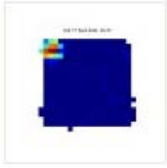

CA1\_77.png

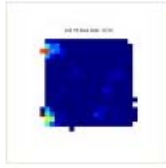

CA1\_78.png

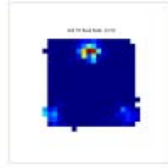

CA1\_79.png

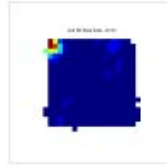

CA1\_80.png

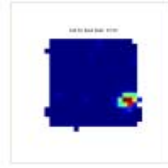

CA1\_81.png

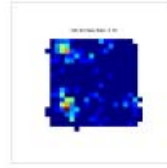

CA1\_82.png

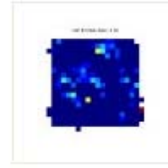

CA1\_83.png

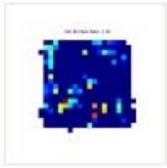

CA1\_84.png

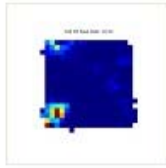

CA1\_85.png

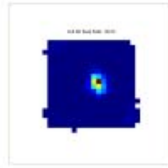

CA1\_86.png

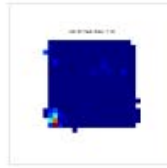

CA1\_87.png

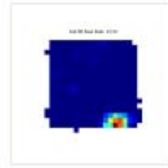

CA1\_88.png

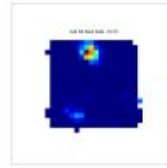

CA1\_89.png

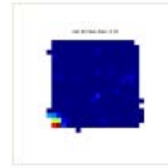

CA1\_90.png

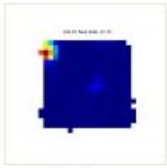

CA1\_91.png

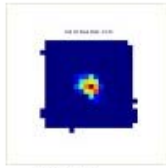

CA1\_92.png

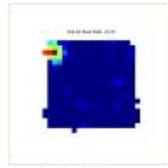

CA1\_93.png

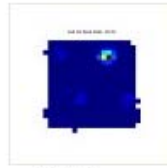

CA1\_94.png

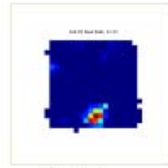

CA1\_95.png

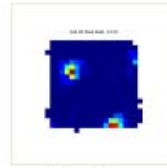

CA1\_96.png

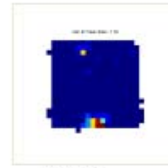

CA1\_97.png

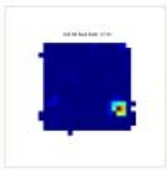

CA1\_98.png

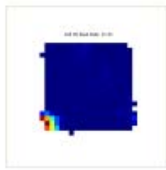

CA1\_99.png

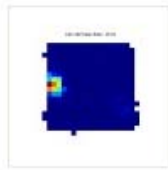

CA1\_100.png

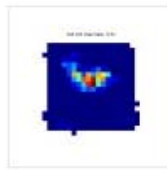

CA1\_101.png

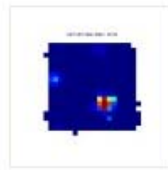

CA1\_102.png

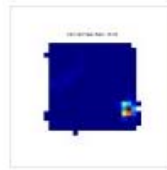

CA1\_103.png

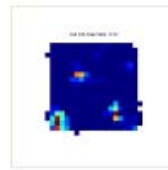

CA1\_104.png

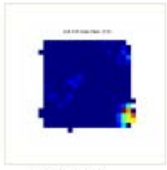

CA1\_105.png

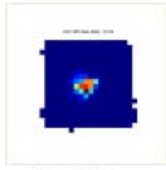

CA1\_106.png

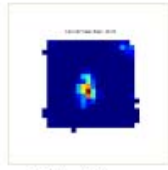

CA1\_107.png

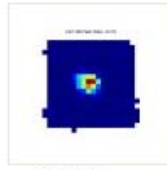

CA1\_108.png

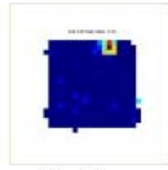

CA1\_109.png

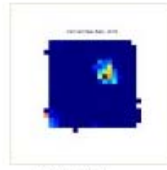

CA1\_110.png

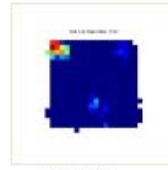

CA1\_111.png

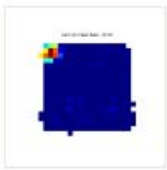

CA1\_112.png

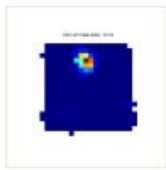

CA1\_113.png

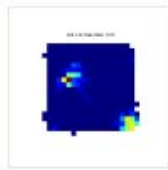

CA1\_114.png

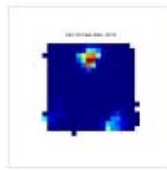

CA1\_115.png

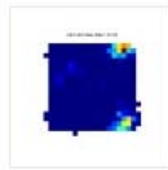

CA1\_116.png

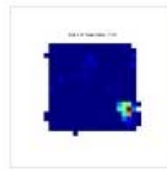

CA1\_117.png

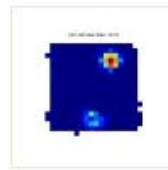

CA1\_118.png

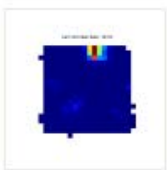

CA1\_119.png

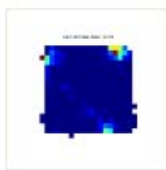

CA1\_120.png

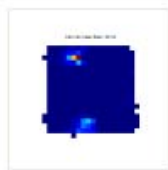

CA1\_121.png

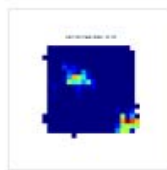

CA1\_122.png

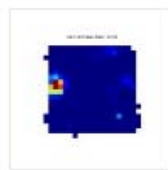

CA1\_123.png

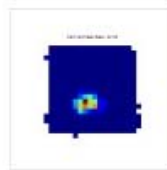

CA1\_124.png

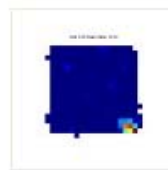

CA1\_125.png

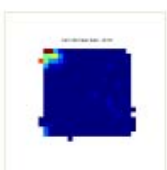

CA1\_126.png

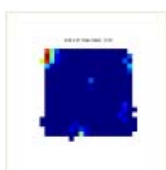

CA1\_127.png

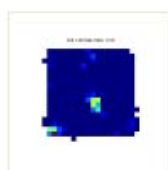

CA1\_128.png

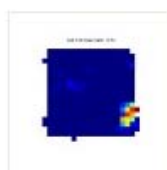

CA1\_129.png

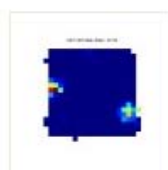

CA1\_130.png

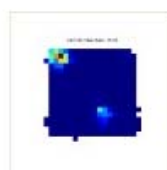

CA1\_131.png

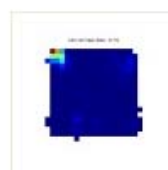

CA1\_132.png

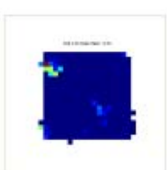

CA1\_133.png

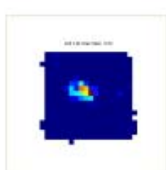

CA1\_134.png

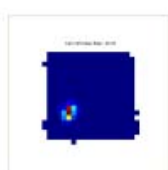

CA1\_135.png

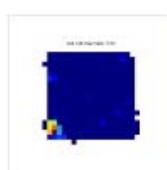

CA1\_136.png

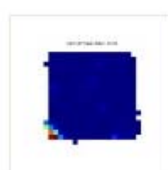

CA1\_137.png

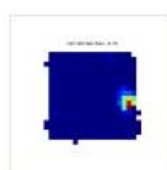

CA1\_138.png

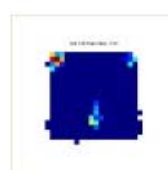

CA1\_139.png

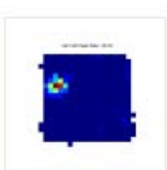

CA1\_140.png

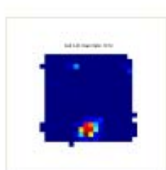

CA1\_141.png

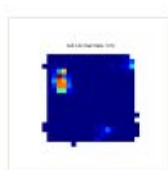

CA1\_142.png

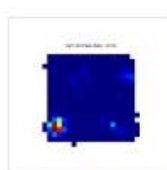

CA1\_143.png

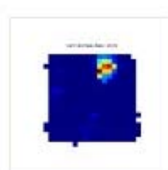

CA1\_144.png

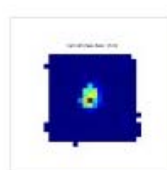

CA1\_145.png

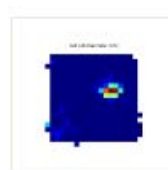

CA1\_146.png

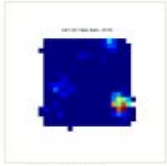

CA1\_147.png

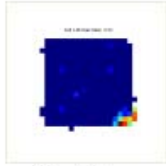

CA1\_148.png

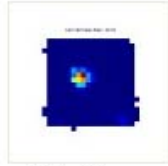

CA1\_149.png

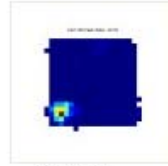

CA1\_150.png

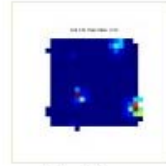

CA1\_151.png

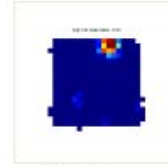

CA1\_152.png

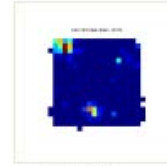

CA1\_153.png

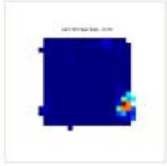

CA1\_154.png

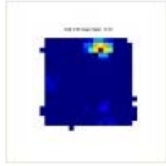

CA1\_155.png

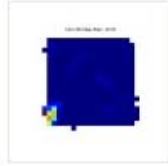

CA1\_156.png

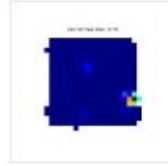

CA1\_157.png

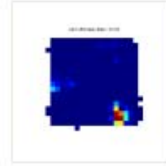

CA1\_158.png

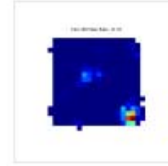

CA1\_159.png

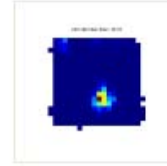

CA1\_160.png

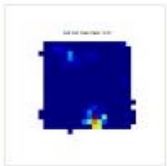

CA1\_161.png

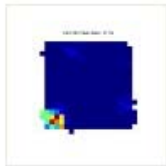

CA1\_162.png

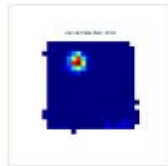

CA1\_163.png

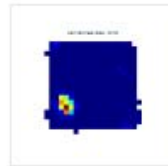

CA1\_164.png

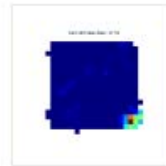

CA1\_165.png

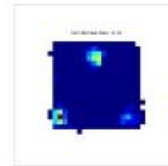

CA1\_166.png

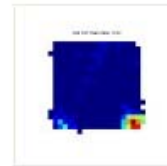

CA1\_167.png

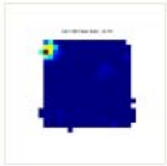

CA1\_168.png

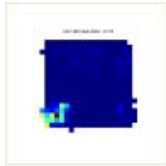

CA1\_169.png

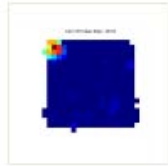

CA1\_170.png

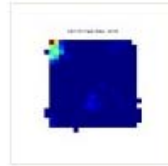

CA1\_171.png

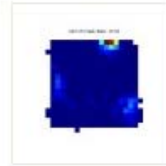

CA1\_172.png

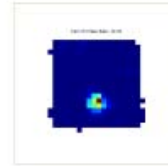

CA1\_173.png

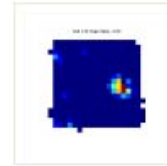

CA1\_174.png

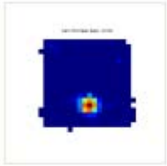

CA1\_175.png

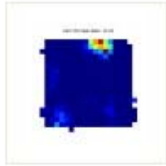

CA1\_176.png

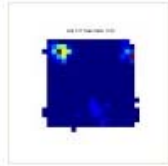

CA1\_177.png

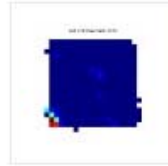

CA1\_178.png

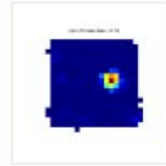

CA1\_179.png

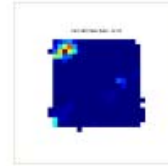

CA1\_180.png

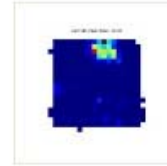

CA1\_181.png

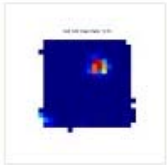

CA1\_182.png

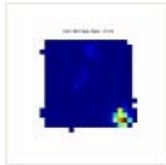

CA1\_183.png

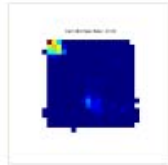

CA1\_184.png

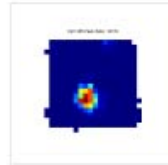

CA1\_185.png

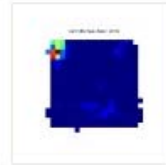

CA1\_186.png

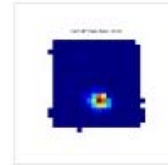

CA1\_187.png

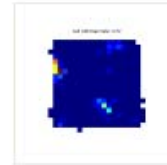

CA1\_188.png

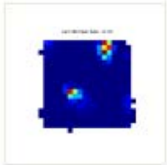

CA1\_189.png

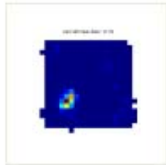

CA1\_190.png

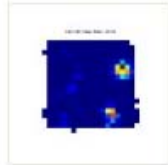

CA1\_191.png

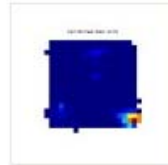

CA1\_192.png

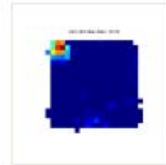

CA1\_193.png

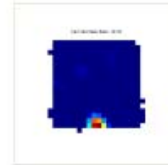

CA1\_194.png

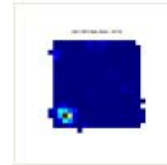

CA1\_195.png

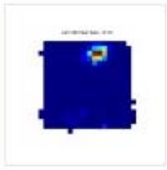

CA1\_196.png

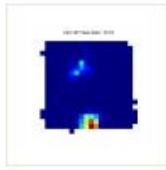

CA1\_197.png

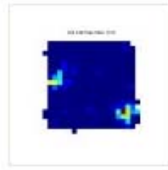

CA1\_198.png

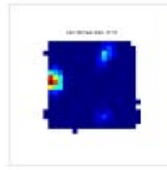

CA1\_199.png

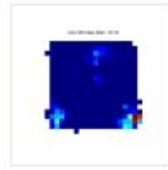

CA1\_200.png

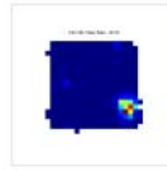

CA1\_201.png

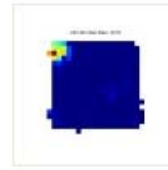

CA1\_202.png

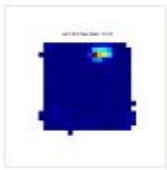

CA1\_203.png

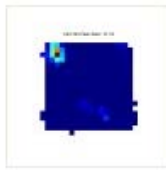

CA1\_204.png

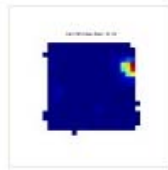

CA1\_205.png

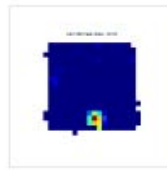

CA1\_206.png

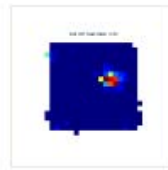

CA1\_207.png

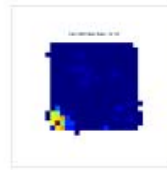

CA1\_208.png

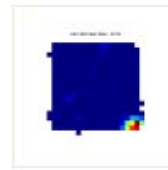

CA1\_209.png

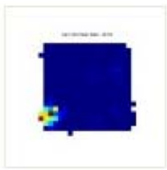

CA1\_210.png

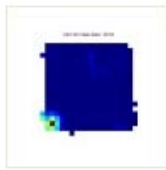

CA1\_211.png

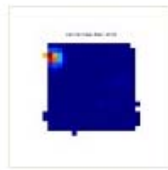

CA1\_212.png

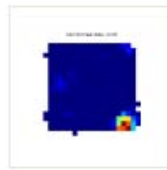

CA1\_213.png

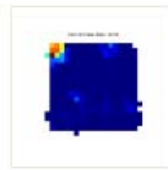

CA1\_214.png

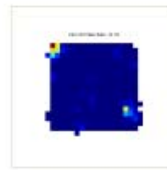

CA1\_215.png

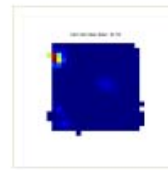

CA1\_216.png

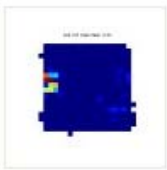

CA1\_217.png

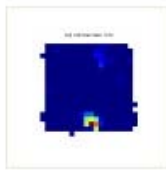

CA1\_218.png

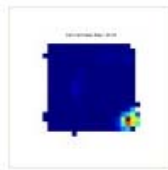

CA1\_219.png

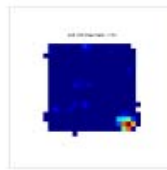

CA1\_220.png

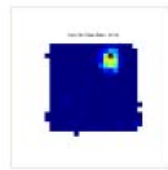

CA1\_221.png

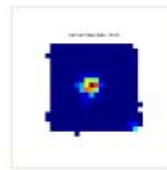

CA1\_222.png

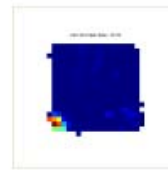

CA1\_223.png

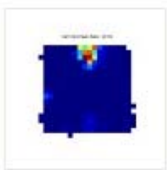

CA1\_224.png

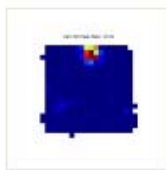

CA1\_225.png

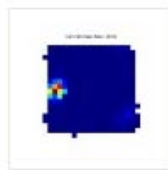

CA1\_226.png

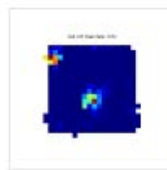

CA1\_227.png

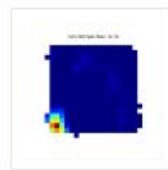

CA1\_228.png

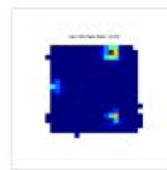

CA1\_229.png

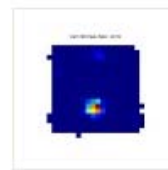

CA1\_230.png

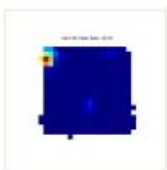

CA1\_231.png

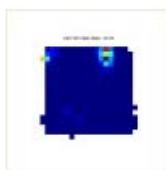

CA1\_232.png

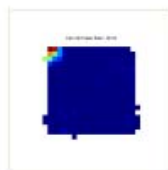

CA1\_233.png

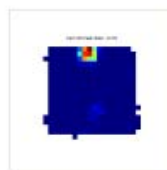

CA1\_234.png

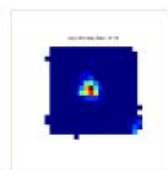

CA1\_235.png

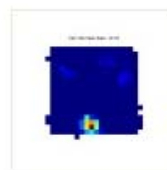

CA1\_236.png

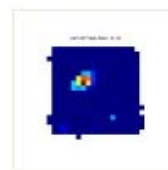

CA1\_237.png

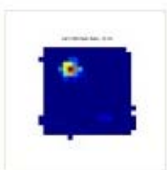

CA1\_238.png

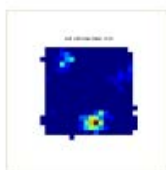

CA1\_239.png

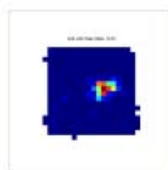

CA1\_240.png

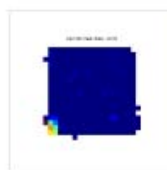

CA1\_241.png

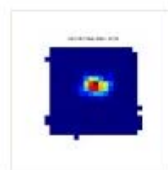

CA1\_242.png

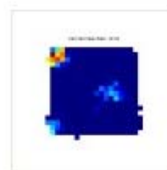

CA1\_243.png

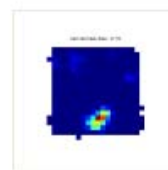

CA1\_244.png

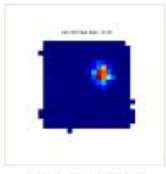

CA1\_245.png

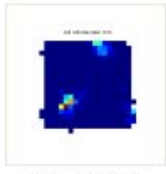

CA1\_246.png

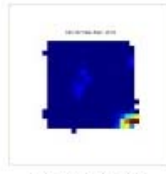

CA1\_247.png

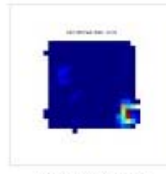

CA1\_248.png

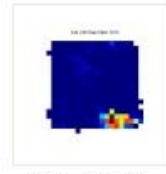

CA1\_249.png

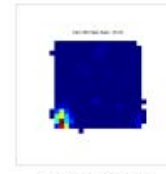

CA1\_250.png

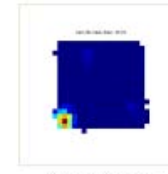

CA1\_251.png

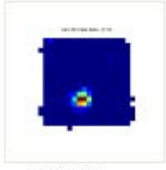

CA1\_252.png

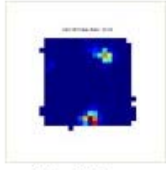

CA1\_253.png

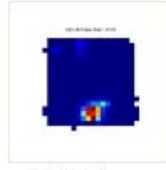

CA1\_254.png

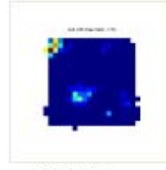

CA1\_255.png

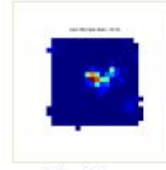

CA1\_256.png

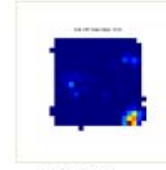

CA1\_257.png

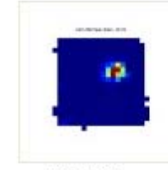

CA1\_258.png

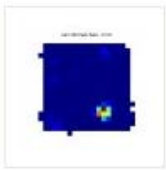

CA1\_259.png

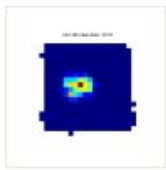

CA1\_260.png

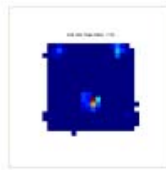

CA1\_261.png

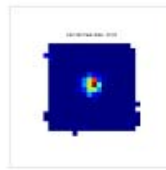

CA1\_262.png

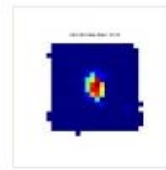

CA1\_263.png

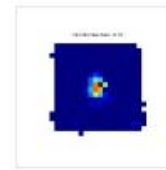

CA1\_264.png

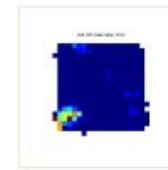

CA1\_265.png

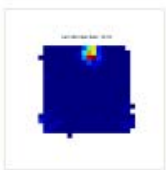

CA1\_266.png

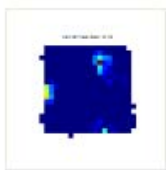

CA1\_267.png

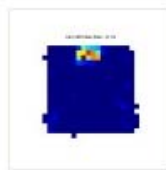

CA1\_268.png

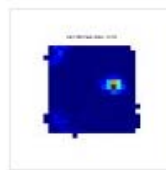

CA1\_269.png

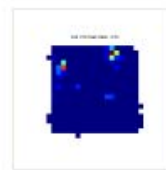

CA1\_270.png

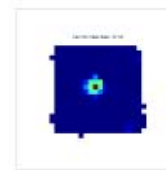

CA1\_271.png

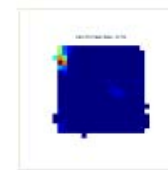

CA1\_272.png

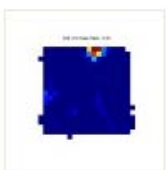

CA1\_273.png

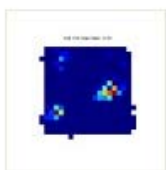

CA1\_274.png

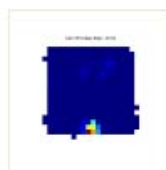

CA1\_275.png

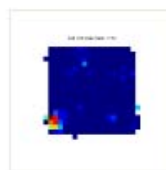

CA1\_276.png

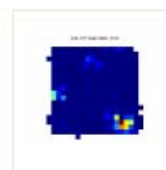

CA1\_277.png

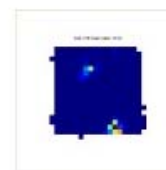

CA1\_278.png

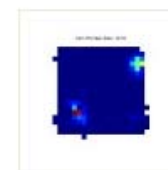

CA1\_279.png

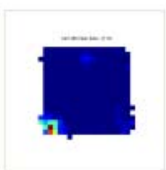

CA1\_280.png

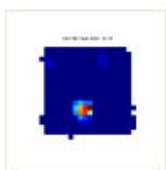

CA1\_281.png

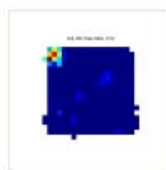

CA1\_282.png

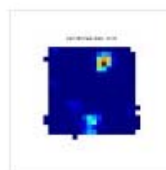

CA1\_283.png

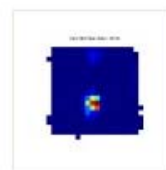

CA1\_284.png

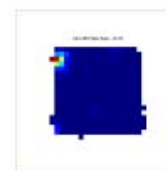

CA1\_285.png

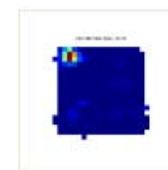

CA1\_286.png

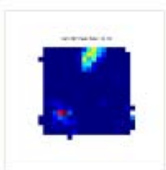

CA1\_287.png

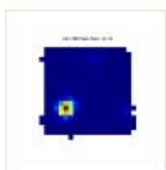

CA1\_288.png

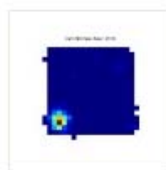

CA1\_289.png

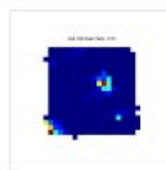

CA1\_290.png

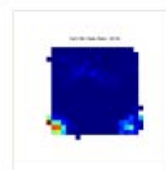

CA1\_291.png

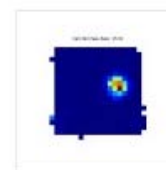

CA1\_292.png

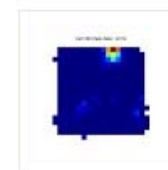

CA1\_293.png

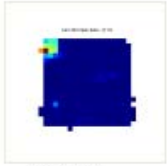

CA1\_294.png

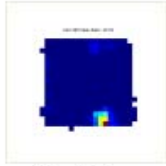

CA1\_295.png

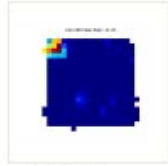

CA1\_296.png

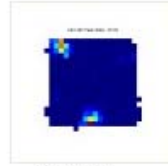

CA1\_297.png

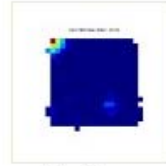

CA1\_298.png

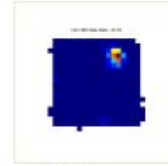

CA1\_299.png

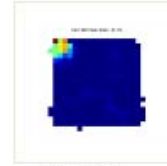

CA1\_300.png

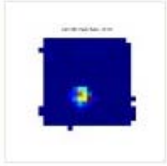

CA1\_301.png

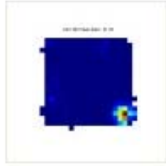

CA1\_302.png

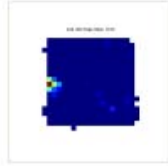

CA1\_303.png

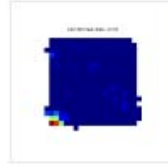

CA1\_304.png

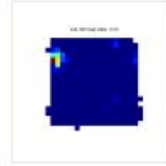

CA1\_305.png

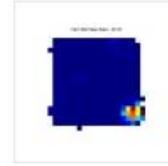

CA1\_306.png

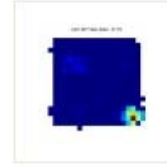

CA1\_307.png

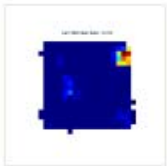

CA1\_308.png

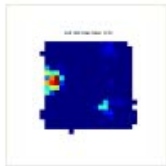

CA1\_309.png

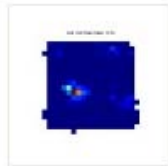

CA1\_310.png

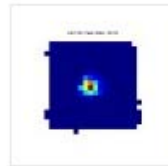

CA1\_311.png

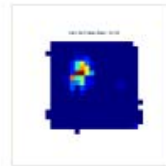

CA1\_312.png

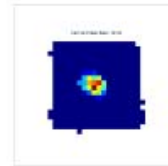

CA1\_313.png

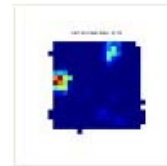

CA1\_314.png

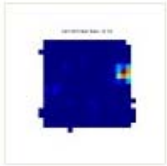

CA1\_315.png

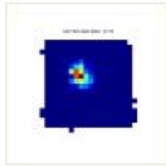

CA1\_316.png

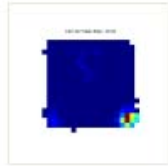

CA1\_317.png

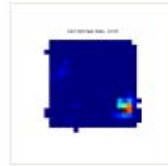

CA1\_318.png

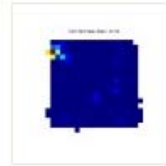

CA1\_319.png

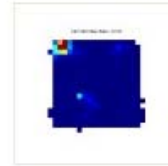

CA1\_320.png

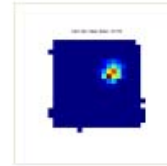

CA1\_321.png

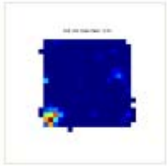

CA1\_322.png

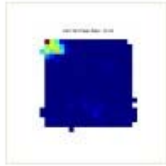

CA1\_323.png

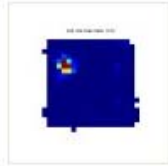

CA1\_324.png

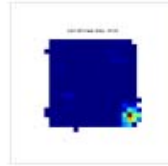

CA1\_325.png

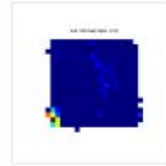

CA1\_326.png

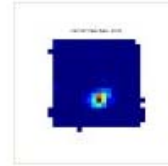

CA1\_327.png

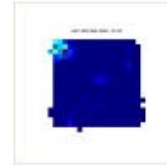

CA1\_328.png

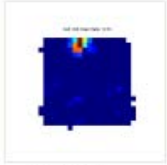

CA1\_329.png

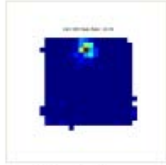

CA1\_330.png

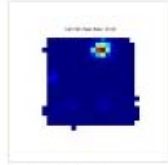

CA1\_331.png

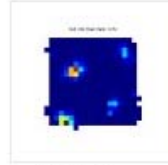

CA1\_332.png

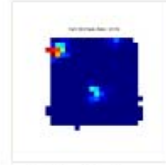

CA1\_333.png

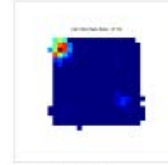

CA1\_334.png

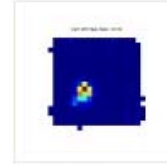

CA1\_335.png

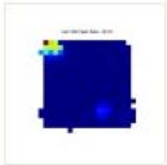

CA1\_336.png

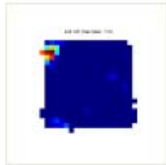

CA1\_337.png

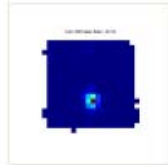

CA1\_338.png

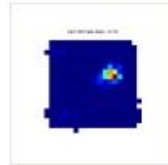

CA1\_339.png

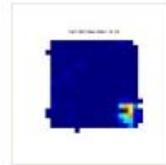

CA1\_340.png

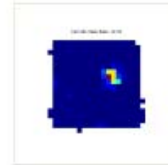

CA1\_341.png

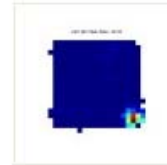

CA1\_342.png



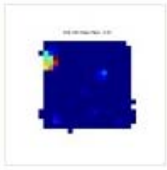

CA1\_343.png

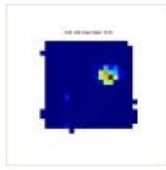

CA1\_344.png

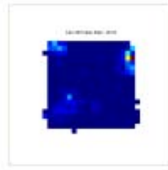

CA1\_345.png

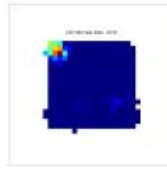

CA1\_346.png

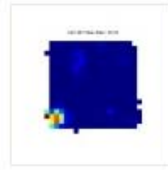

CA1\_347.png

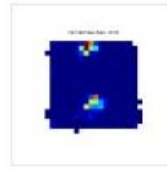

CA1\_348.png

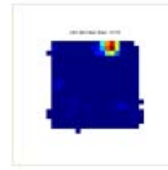

CA1\_349.png

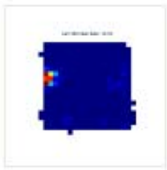

CA1\_350.png

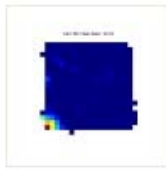

CA1\_351.png

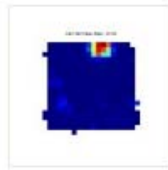

CA1\_352.png

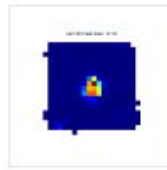

CA1\_353.png

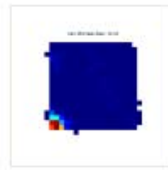

CA1\_354.png

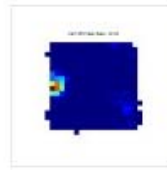

CA1\_355.png

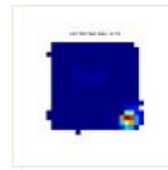

CA1\_356.png

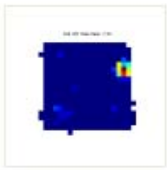

CA1\_357.png

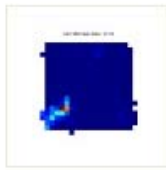

CA1\_358.png

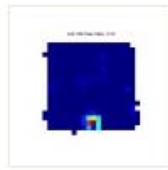

CA1\_359.png

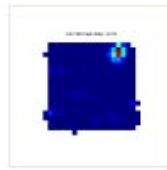

CA1\_360.png

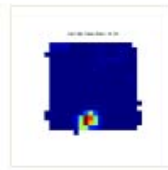

CA1\_361.png

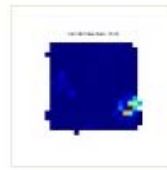

CA1\_362.png

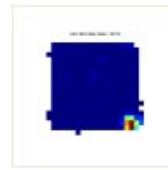

CA1\_363.png

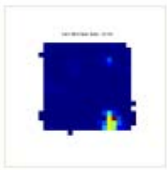

CA1\_364.png

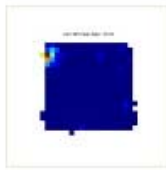

CA1\_365.png

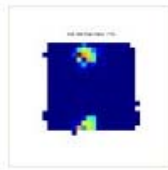

CA1\_366.png

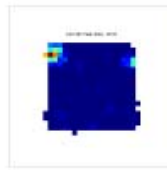

CA1\_367.png

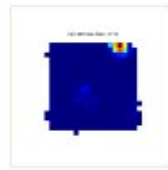

CA1\_368.png

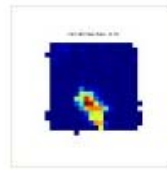

CA1\_369.png

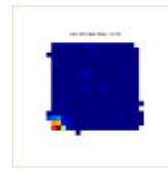

CA1\_370.png

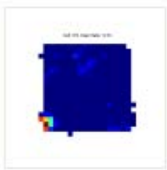

CA1\_371.png

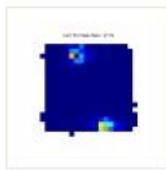

CA1\_372.png

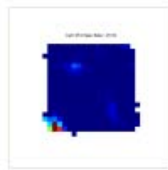

CA1\_373.png

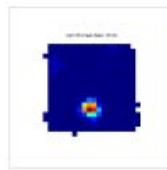

CA1\_374.png

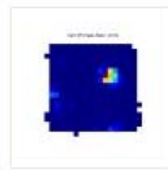

CA1\_375.png

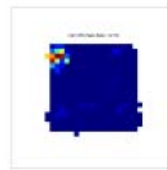

CA1\_376.png

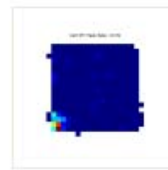

CA1\_377.png

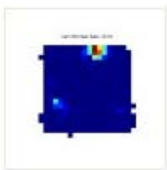

CA1\_378.png

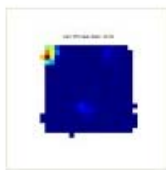

CA1\_379.png

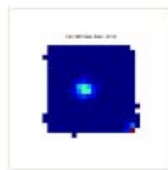

CA1\_380.png

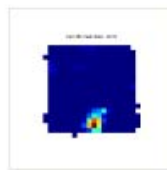

CA1\_381.png

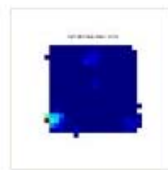

CA1\_382.png

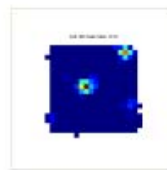

CA1\_383.png

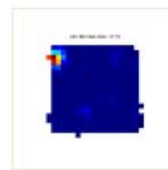

CA1\_384.png

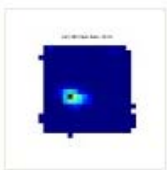

CA1\_385.png

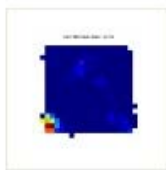

CA1\_386.png

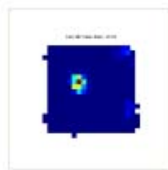

CA1\_387.png

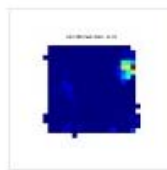

CA1\_388.png

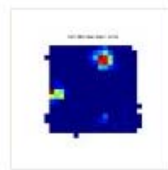

CA1\_389.png

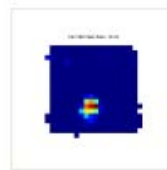

CA1\_390.png

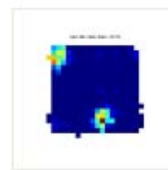

CA1\_391.png

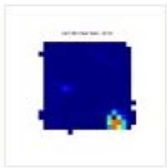

CA1\_392.png

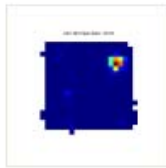

CA1\_393.png

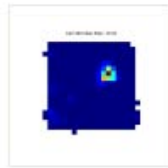

CA1\_394.png

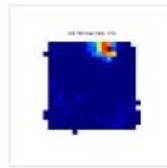

CA1\_395.png

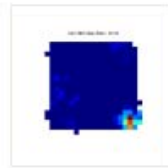

CA1\_396.png

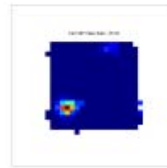

CA1\_397.png

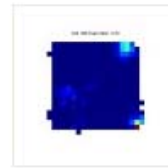

CA1\_398.png

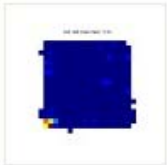

CA1\_399.png

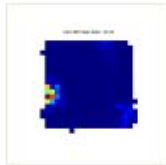

CA1\_400.png

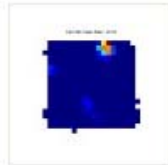

CA1\_401.png

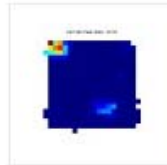

CA1\_402.png

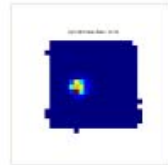

CA1\_403.png

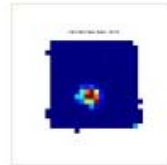

CA1\_404.png

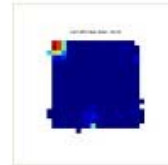

CA1\_405.png

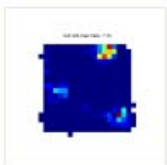

CA1\_406.png

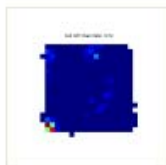

CA1\_407.png

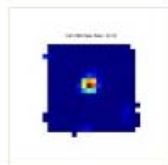

CA1\_408.png

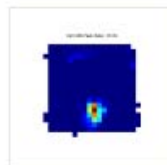

CA1\_409.png

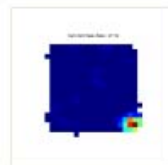

CA1\_410.png

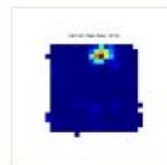

CA1\_411.png

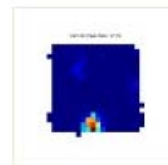

CA1\_412.png

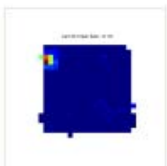

CA1\_413.png

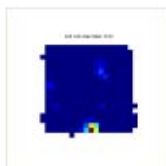

CA1\_414.png

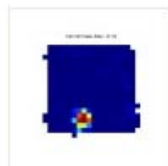

CA1\_415.png

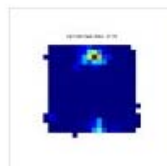

CA1\_416.png

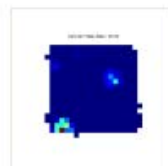

CA1\_417.png

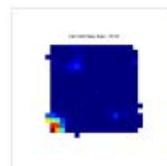

CA1\_418.png

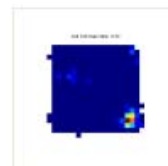

CA1\_419.png

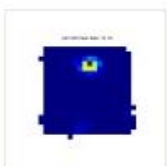

CA1\_420.png

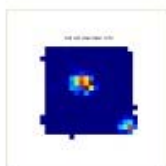

CA1\_421.png

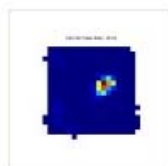

CA1\_422.png

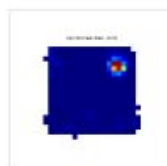

CA1\_423.png

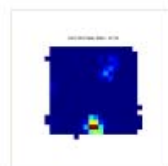

CA1\_424.png

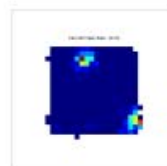

CA1\_425.png

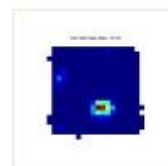

CA1\_426.png

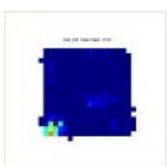

CA1\_427.png

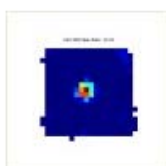

CA1\_428.png

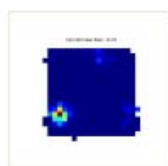

CA1\_429.png

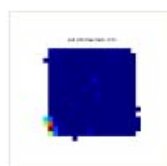

CA1\_430.png

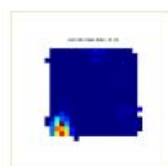

CA1\_431.png

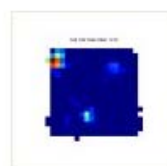

CA1\_432.png

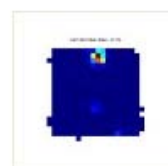

CA1\_433.png

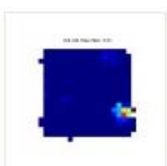

CA1\_434.png

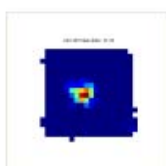

CA1\_435.png

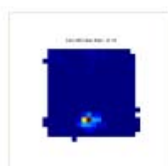

CA1\_436.png

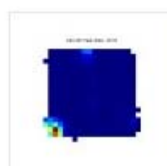

CA1\_437.png

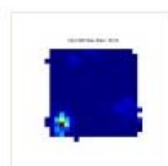

CA1\_438.png

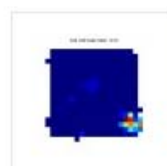

CA1\_439.png

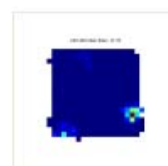

CA1\_440.png

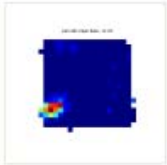

CA1\_441.png

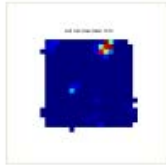

CA1\_442.png

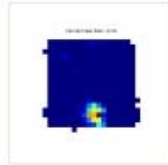

CA1\_443.png

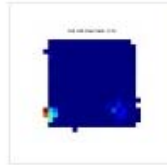

CA1\_444.png

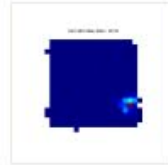

CA1\_445.png

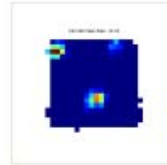

CA1\_446.png

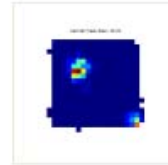

CA1\_447.png

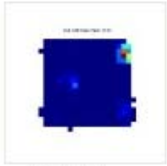

CA1\_448.png

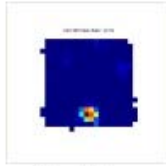

CA1\_449.png

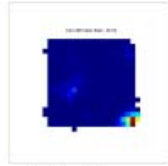

CA1\_450.png

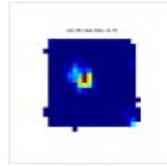

CA1\_451.png

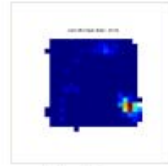

CA1\_452.png

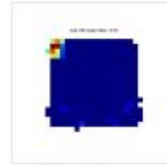

CA1\_453.png

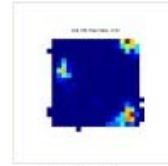

CA1\_454.png

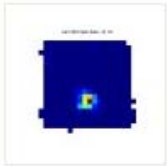

CA1\_455.png

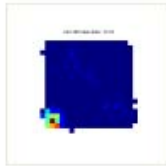

CA1\_456.png

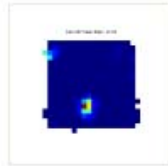

CA1\_457.png

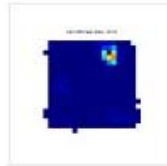

CA1\_458.png

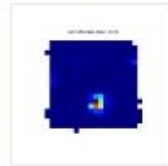

CA1\_459.png

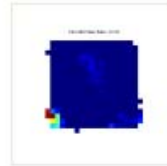

CA1\_460.png

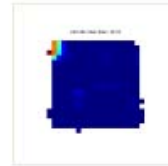

CA1\_461.png

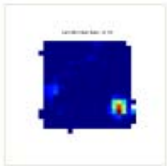

CA1\_462.png

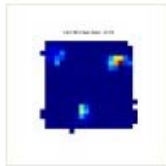

CA1\_463.png

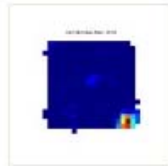

CA1\_464.png

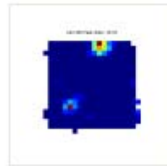

CA1\_465.png

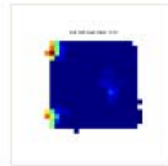

CA1\_466.png

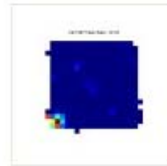

CA1\_467.png

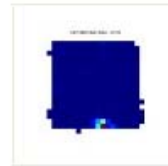

CA1\_468.png

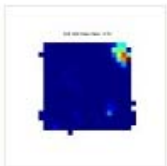

CA1\_469.png

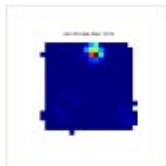

CA1\_470.png

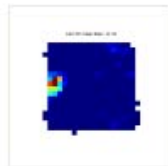

CA1\_471.png

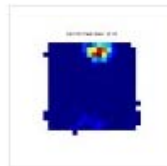

CA1\_472.png

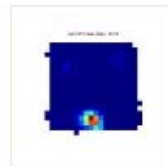

CA1\_473.png

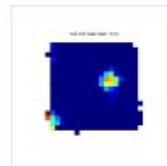

CA1\_474.png

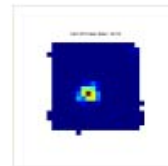

CA1\_475.png

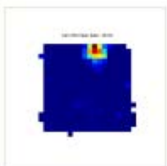

CA1\_476.png

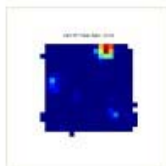

CA1\_477.png

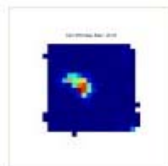

CA1\_478.png

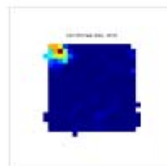

CA1\_479.png

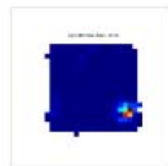

CA1\_480.png

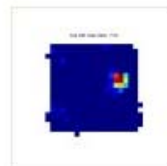

CA1\_481.png

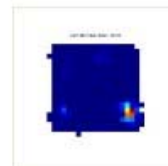

CA1\_482.png

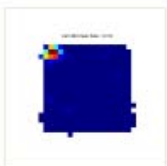

CA1\_483.png

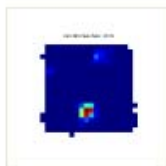

CA1\_484.png

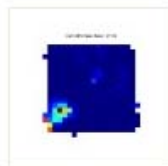

CA1\_485.png

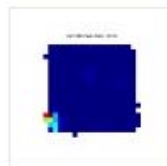

CA1\_486.png

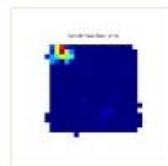

CA1\_487.png

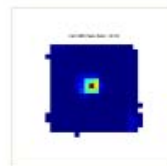

CA1\_488.png

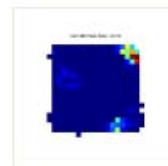

CA1\_489.png

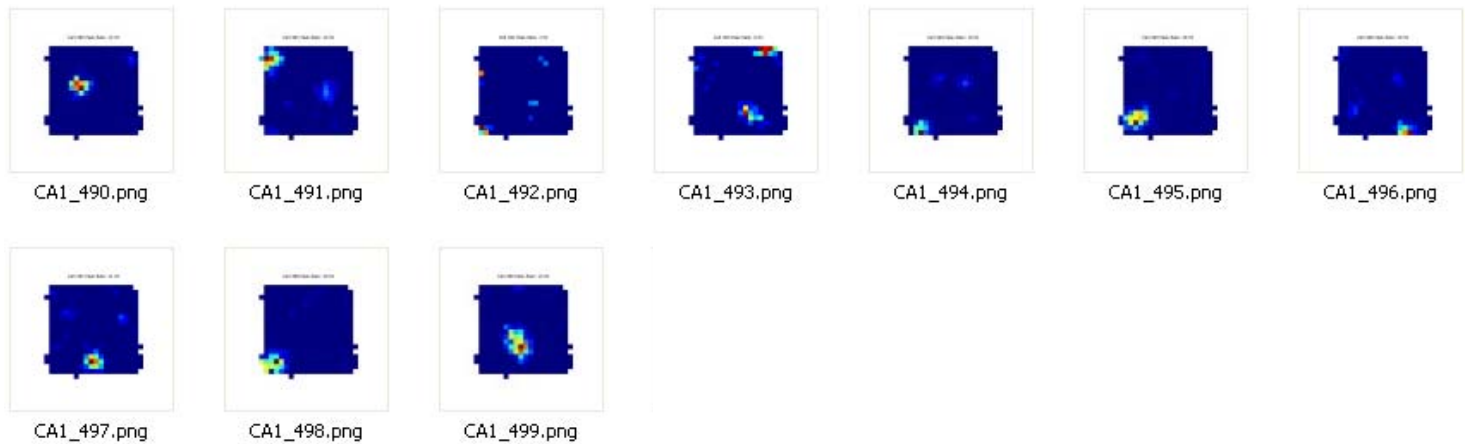

Supplementary Figure 4. Firing rate maps of all the ‘place cells’ simulated in Simulation 1. The cells are ordered based on the original numbering of the output cells in the simulation. Spatial information scores (Skaggs et al., 1996) were calculated from the rate maps and were compared with the scores of place field maps produced by random shuffling of the spike train with the position data for each cell (a standard statistical analysis for place-field data). In all cases, the information score for the original rate map was greater than the scores produced by 100 random shuffles. It is possible that this result could be obtained if a cell fired a single burst of spikes at one location. However, the place-field definition criterion of  $> 0.033$  Hz firing rate meant that the cell had to fire a minimum of 30 spikes in the 15-min session to meet criterion as a place field. In fact, in Simulation 1, 497/500 cells produced at least 50 spikes, and 484/500 cells produced at least 100 spikes. Visual inspection of the session data showed that all cells fired at multiple time points in the session. Thus, the significant p values for spatial information for all 500 cells show that all output cells in this simulation provided a reliable spatial signal that was not an artifact of one or two random bursts of activity.

Supplementary Figure 5

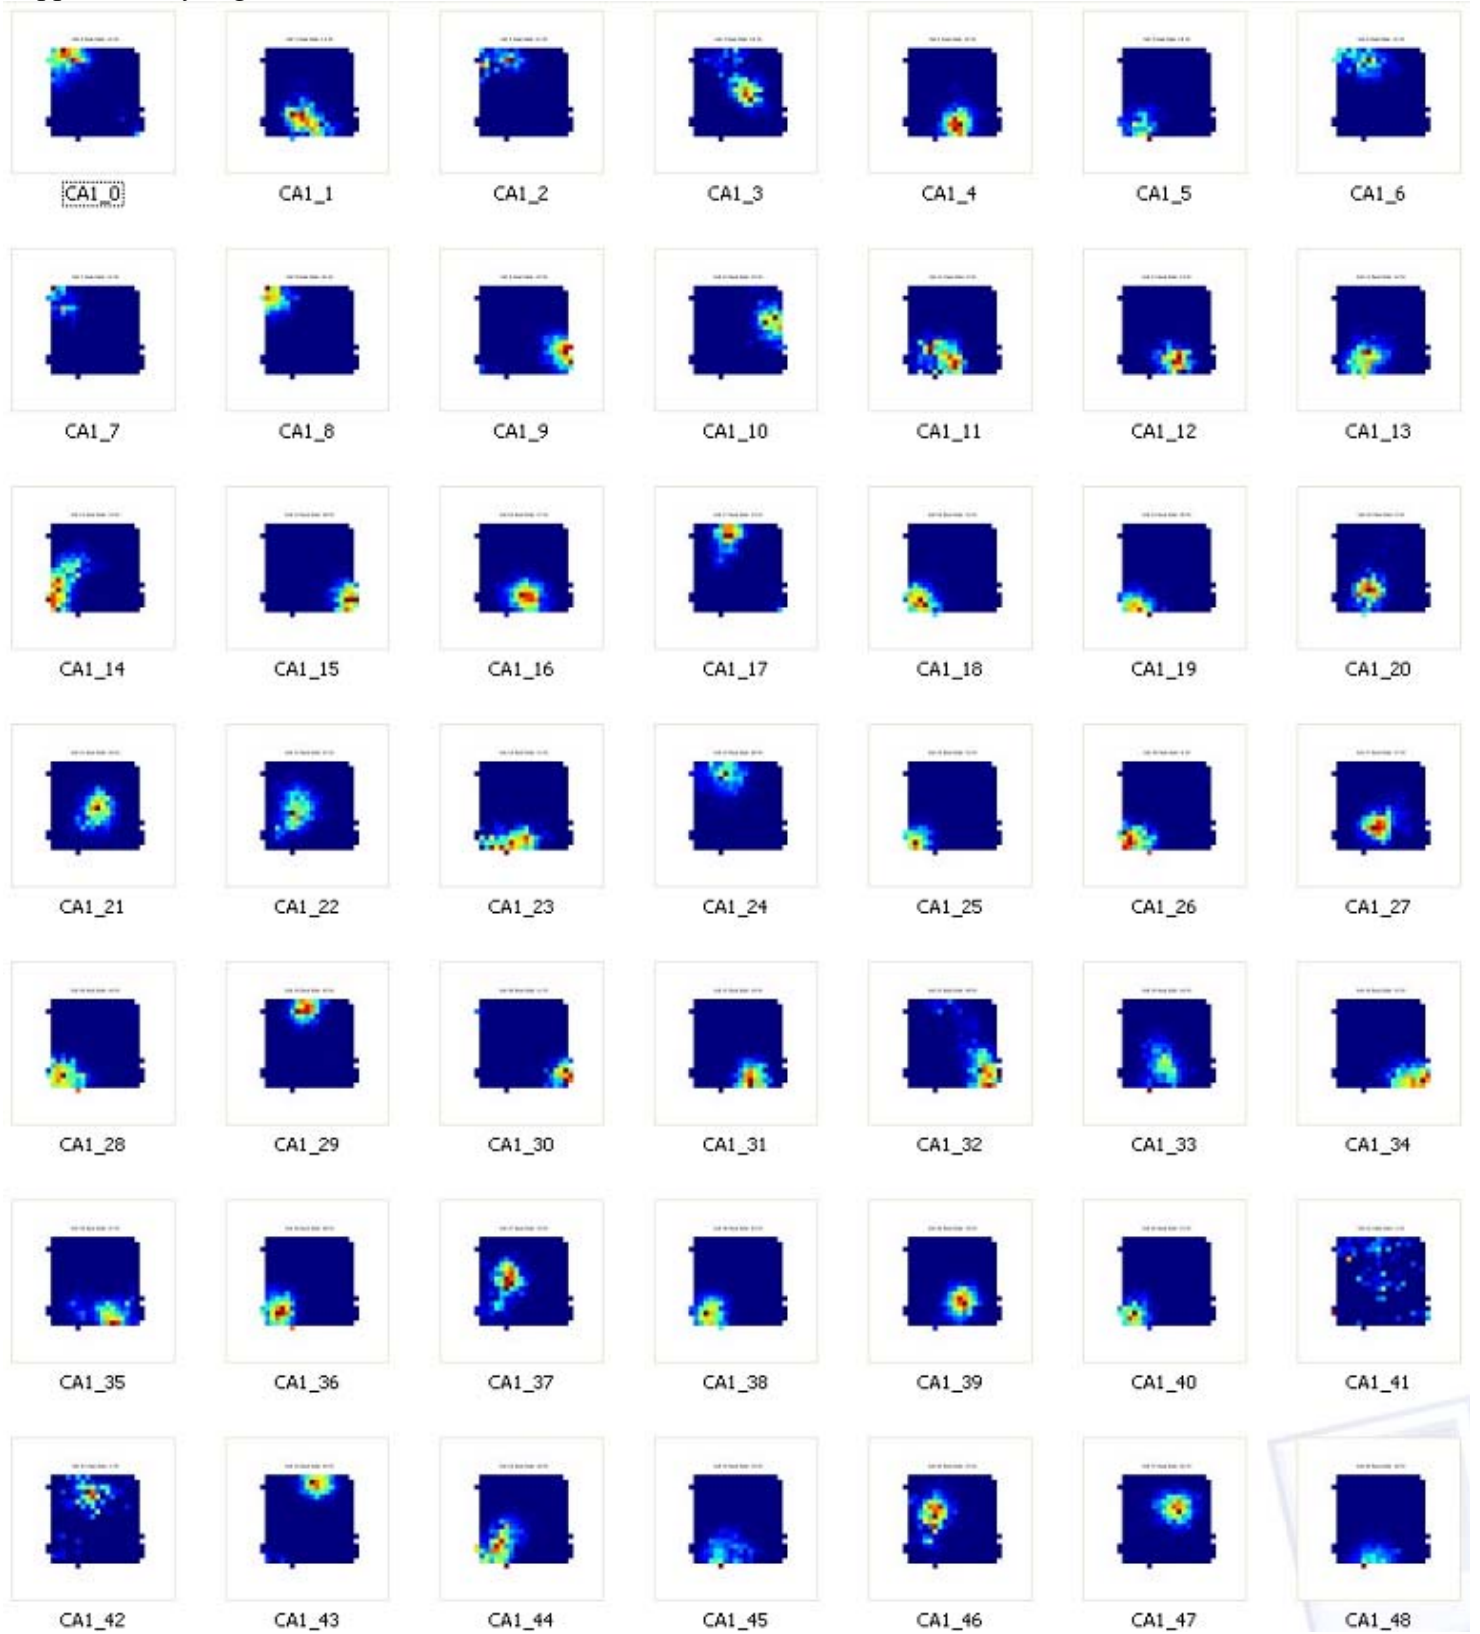

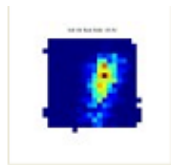

CA1\_49

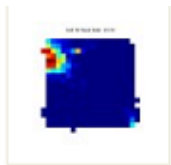

CA1\_50

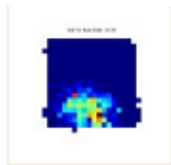

CA1\_51

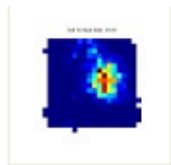

CA1\_52

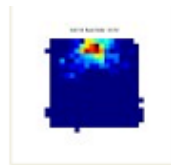

CA1\_53

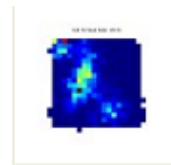

CA1\_54

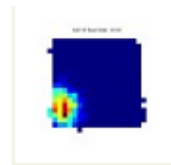

CA1\_55

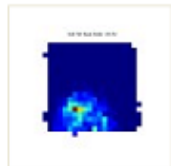

CA1\_56

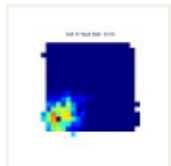

CA1\_57

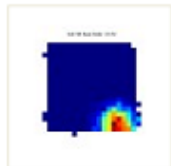

CA1\_58

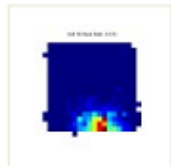

CA1\_59

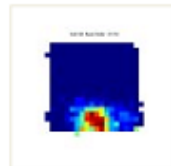

CA1\_60

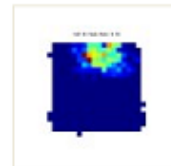

CA1\_61

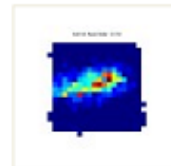

CA1\_62

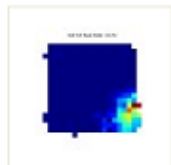

CA1\_63

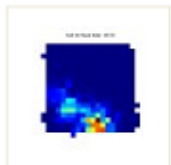

CA1\_64

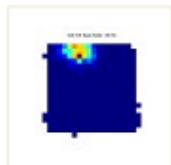

CA1\_65

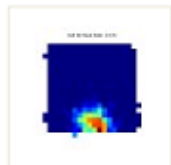

CA1\_66

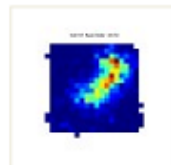

CA1\_67

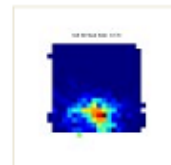

CA1\_68

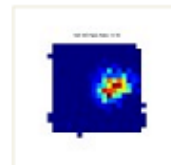

CA1\_69

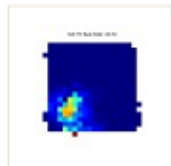

CA1\_70

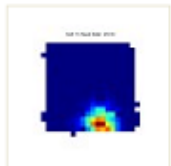

CA1\_71

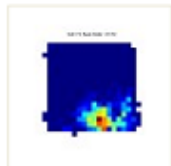

CA1\_72

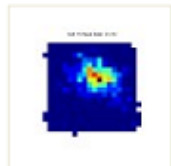

CA1\_73

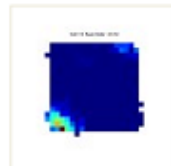

CA1\_74

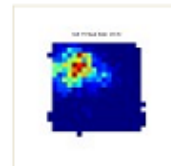

CA1\_75

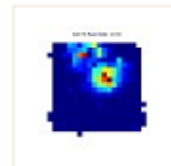

CA1\_76

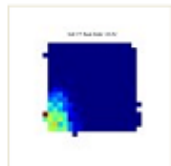

CA1\_77

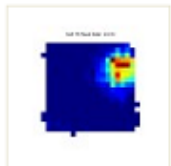

CA1\_78

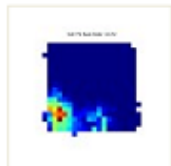

CA1\_79

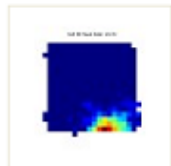

CA1\_80

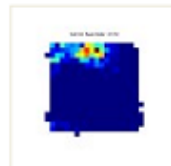

CA1\_81

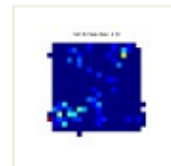

CA1\_82

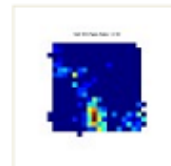

CA1\_83

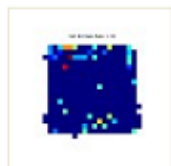

CA1\_84

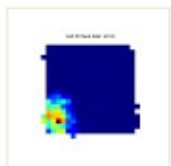

CA1\_85

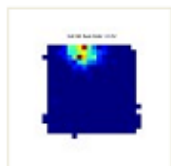

CA1\_86

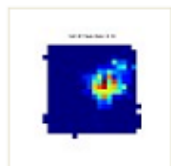

CA1\_87

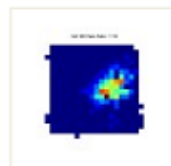

CA1\_88

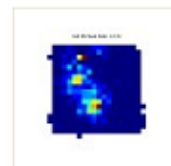

CA1\_89

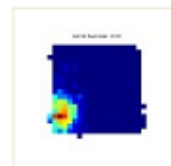

CA1\_90

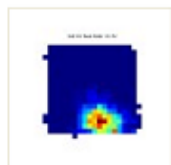

CA1\_91

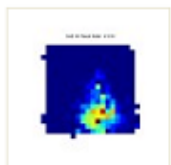

CA1\_92

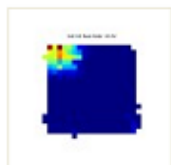

CA1\_93

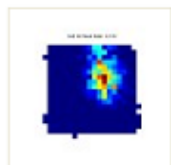

CA1\_94

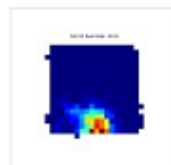

CA1\_95

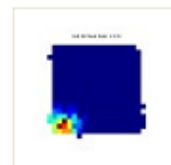

CA1\_96

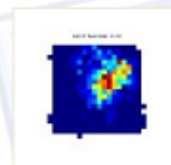

CA1\_97

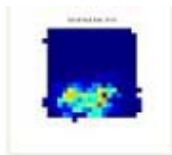

CA1\_98

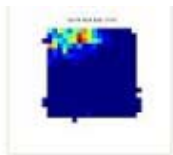

CA1\_99

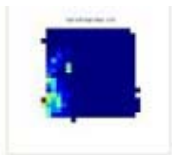

CA1\_100

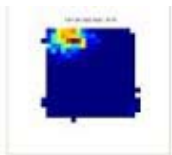

CA1\_101

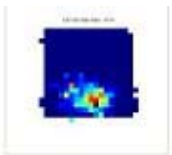

CA1\_102

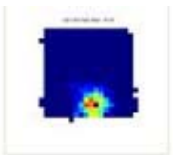

CA1\_103

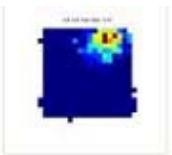

CA1\_104

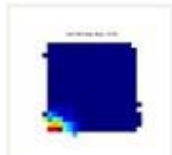

CA1\_105

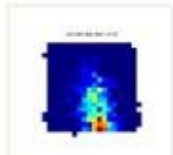

CA1\_106

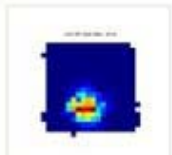

CA1\_107

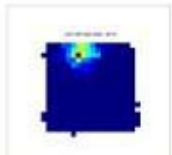

CA1\_108

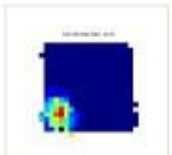

CA1\_109

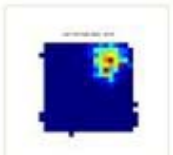

CA1\_110

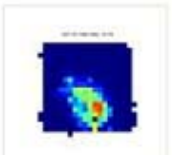

CA1\_111

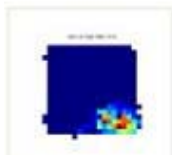

CA1\_112

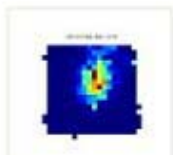

CA1\_113

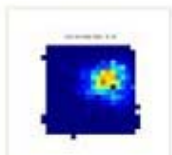

CA1\_114

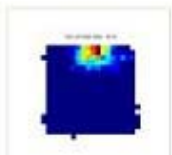

CA1\_115

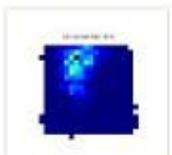

CA1\_116

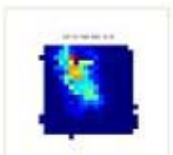

CA1\_117

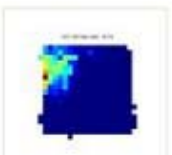

CA1\_118

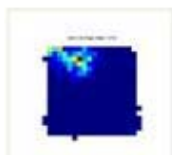

CA1\_119

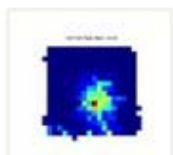

CA1\_120

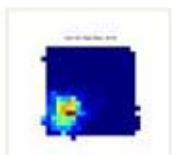

CA1\_121

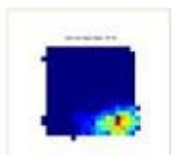

CA1\_122

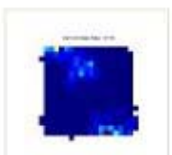

CA1\_123

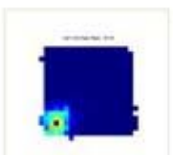

CA1\_124

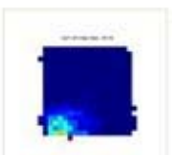

CA1\_125

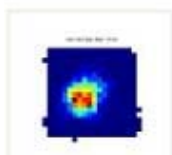

CA1\_126

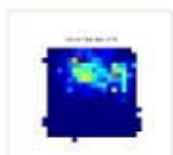

CA1\_127

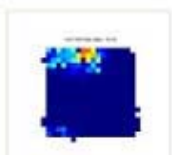

CA1\_128

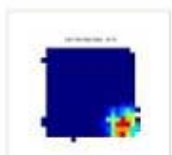

CA1\_129

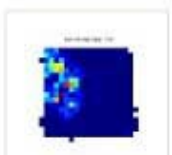

CA1\_130

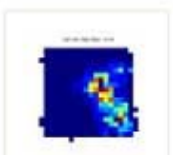

CA1\_131

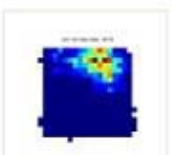

CA1\_132

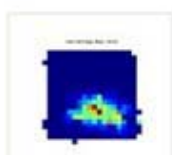

CA1\_133

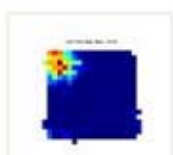

CA1\_134

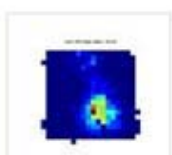

CA1\_135

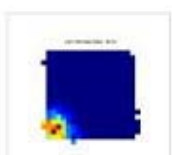

CA1\_136

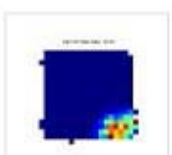

CA1\_137

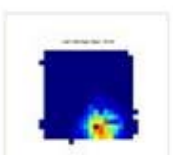

CA1\_138

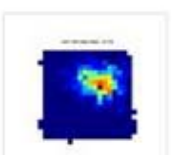

CA1\_139

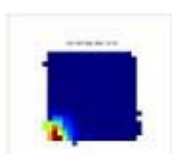

CA1\_140

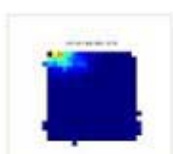

CA1\_141

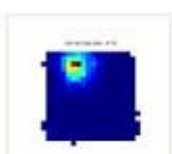

CA1\_142

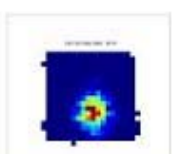

CA1\_143

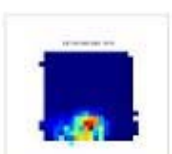

CA1\_144

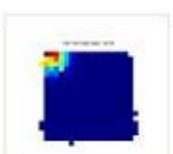

CA1\_145

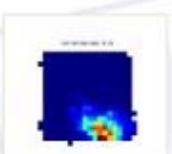

CA1\_146

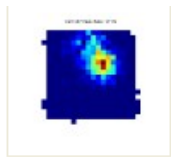

CA1\_147

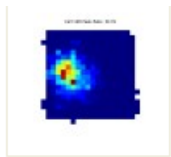

CA1\_148

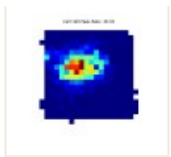

CA1\_149

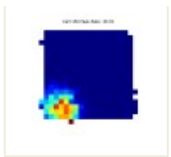

CA1\_150

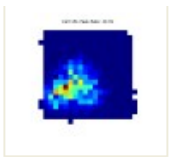

CA1\_151

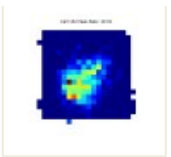

CA1\_152

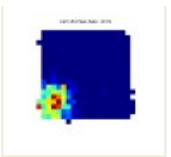

CA1\_153

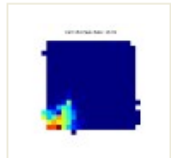

CA1\_154

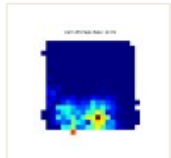

CA1\_155

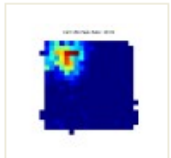

CA1\_156

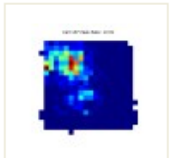

CA1\_157

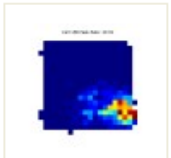

CA1\_158

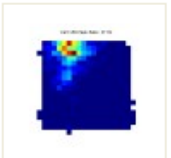

CA1\_159

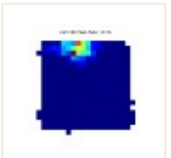

CA1\_160

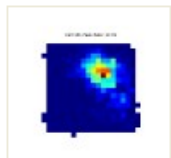

CA1\_161

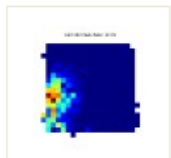

CA1\_162

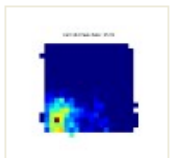

CA1\_163

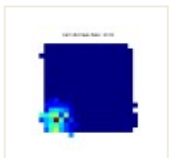

CA1\_164

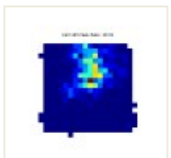

CA1\_165

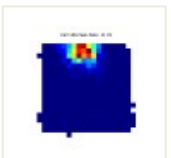

CA1\_166

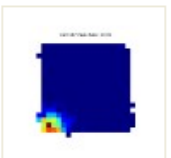

CA1\_167

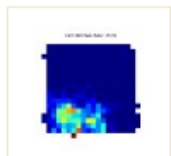

CA1\_168

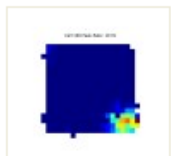

CA1\_169

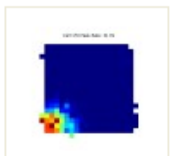

CA1\_170

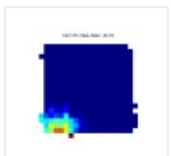

CA1\_171

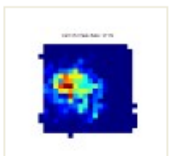

CA1\_172

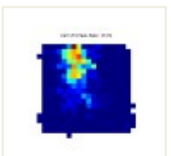

CA1\_173

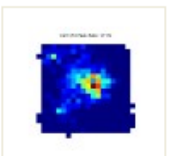

CA1\_174

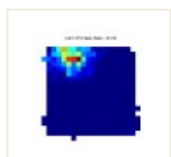

CA1\_175

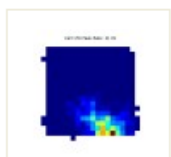

CA1\_176

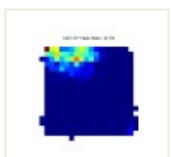

CA1\_177

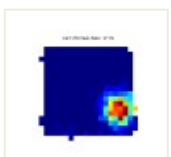

CA1\_178

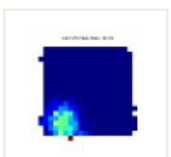

CA1\_179

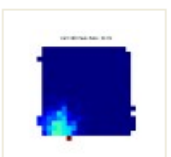

CA1\_180

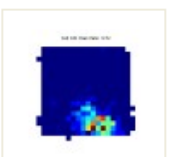

CA1\_181

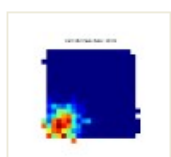

CA1\_182

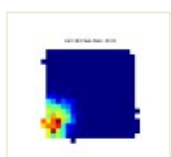

CA1\_183

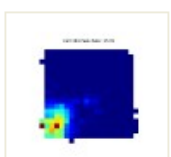

CA1\_184

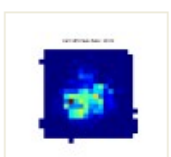

CA1\_185

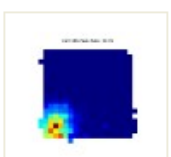

CA1\_186

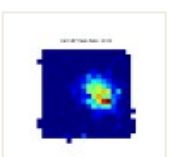

CA1\_187

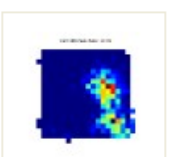

CA1\_188

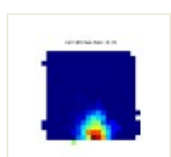

CA1\_189

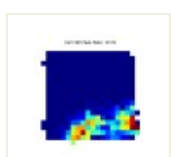

CA1\_190

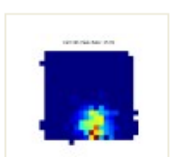

CA1\_191

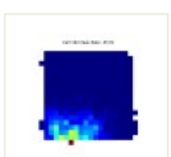

CA1\_192

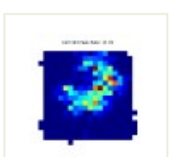

CA1\_193

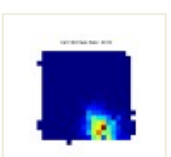

CA1\_194

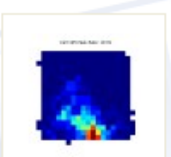

CA1\_195



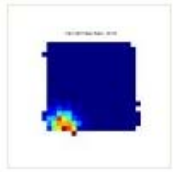

CA1\_245

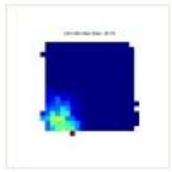

CA1\_246

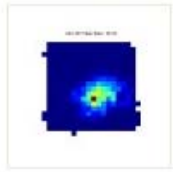

CA1\_247

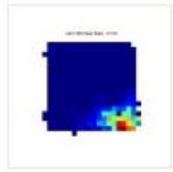

CA1\_248

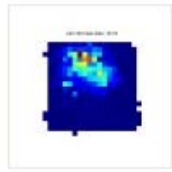

CA1\_249

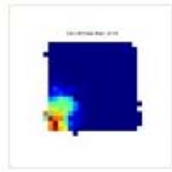

CA1\_250

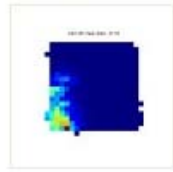

CA1\_251

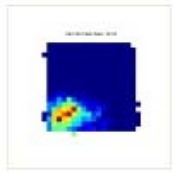

CA1\_252

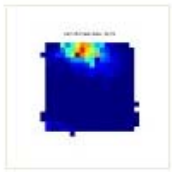

CA1\_253

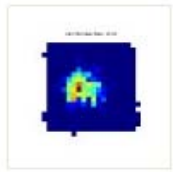

CA1\_254

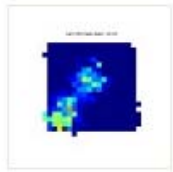

CA1\_255

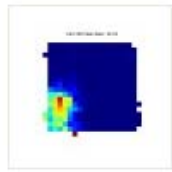

CA1\_256

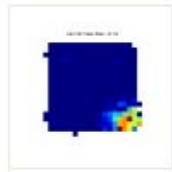

CA1\_257

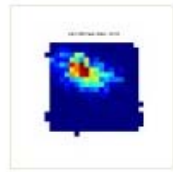

CA1\_258

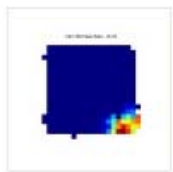

CA1\_259

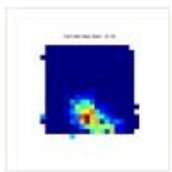

CA1\_260

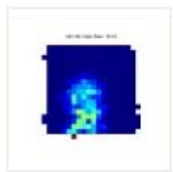

CA1\_261

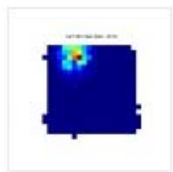

CA1\_262

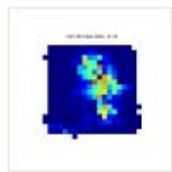

CA1\_263

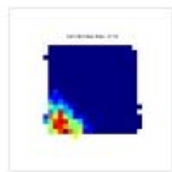

CA1\_264

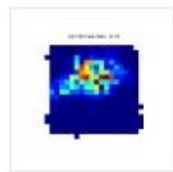

CA1\_265

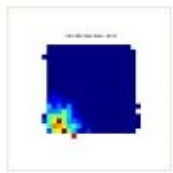

CA1\_266

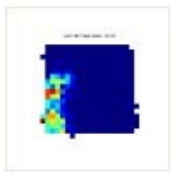

CA1\_267

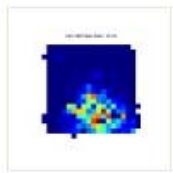

CA1\_268

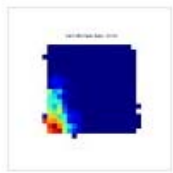

CA1\_269

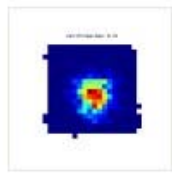

CA1\_270

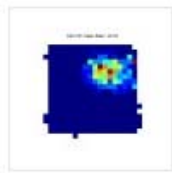

CA1\_271

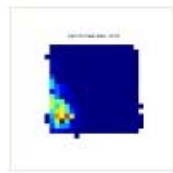

CA1\_272

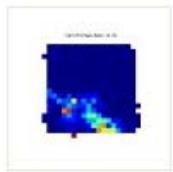

CA1\_273

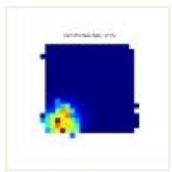

CA1\_274

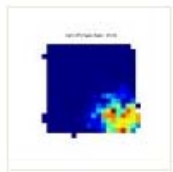

CA1\_275

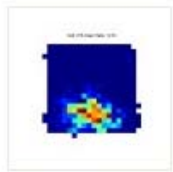

CA1\_276

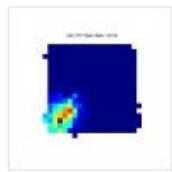

CA1\_277

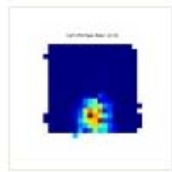

CA1\_278

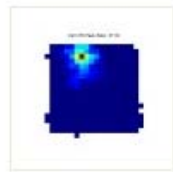

CA1\_279

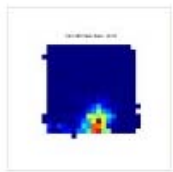

CA1\_280

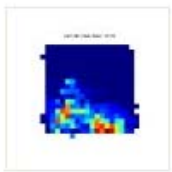

CA1\_281

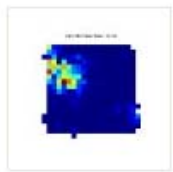

CA1\_282

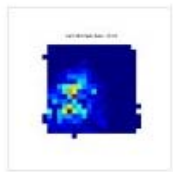

CA1\_283

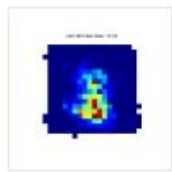

CA1\_284

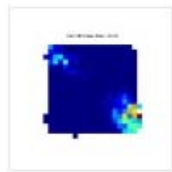

CA1\_285

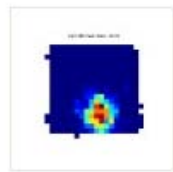

CA1\_286

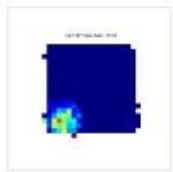

CA1\_287

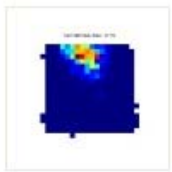

CA1\_288

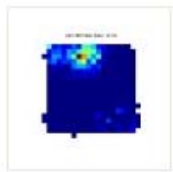

CA1\_289

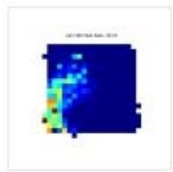

CA1\_290

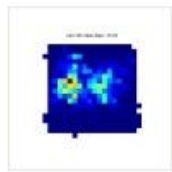

CA1\_291

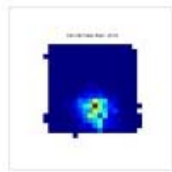

CA1\_292

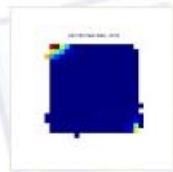

CA1\_293

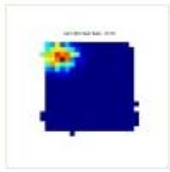

CA1\_294

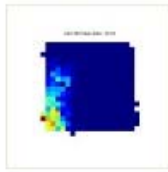

CA1\_295

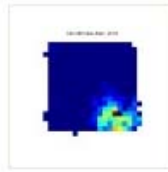

CA1\_296

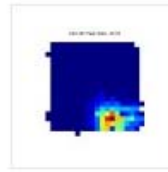

CA1\_297

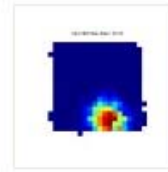

CA1\_298

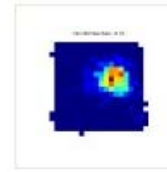

CA1\_299

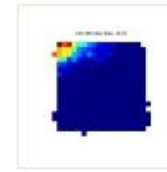

CA1\_300

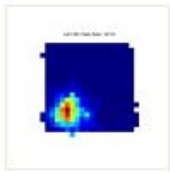

CA1\_301

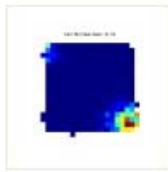

CA1\_302

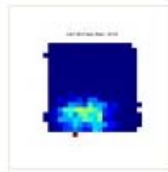

CA1\_303

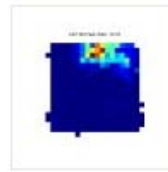

CA1\_304

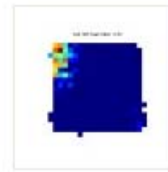

CA1\_305

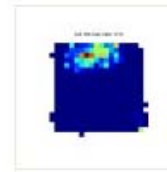

CA1\_306

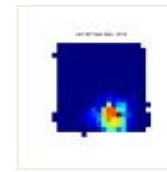

CA1\_307

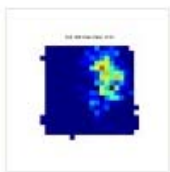

CA1\_308

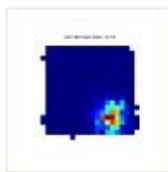

CA1\_309

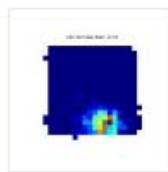

CA1\_310

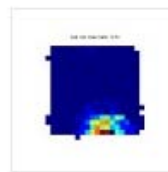

CA1\_311

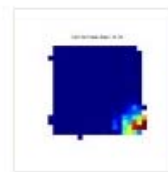

CA1\_312

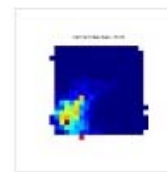

CA1\_313

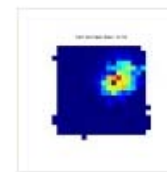

CA1\_314

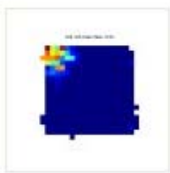

CA1\_315

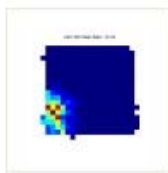

CA1\_316

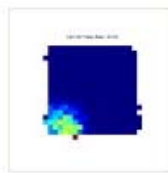

CA1\_317

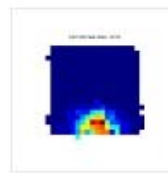

CA1\_318

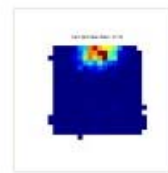

CA1\_319

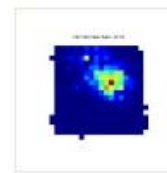

CA1\_320

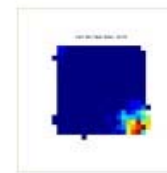

CA1\_321

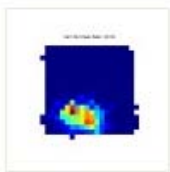

CA1\_322

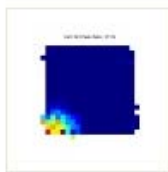

CA1\_323

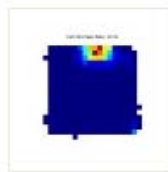

CA1\_324

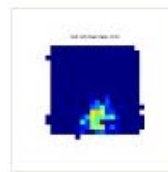

CA1\_325

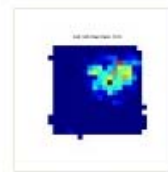

CA1\_326

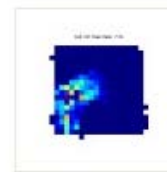

CA1\_327

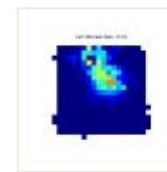

CA1\_328

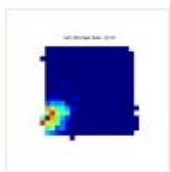

CA1\_329

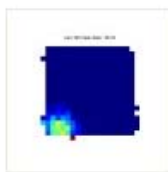

CA1\_330

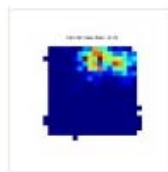

CA1\_331

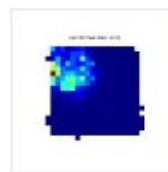

CA1\_332

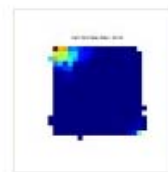

CA1\_333

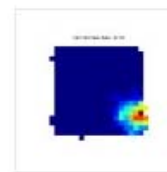

CA1\_334

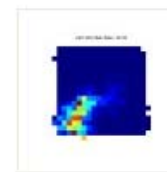

CA1\_335

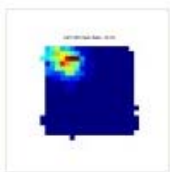

CA1\_336

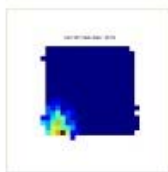

CA1\_337

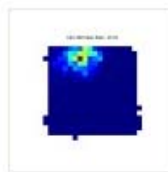

CA1\_338

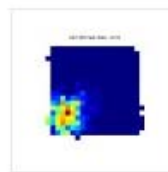

CA1\_339

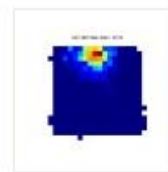

CA1\_340

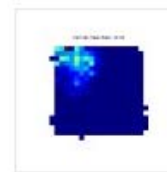

CA1\_341

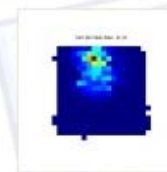

CA1\_342

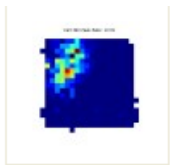

CA1\_392

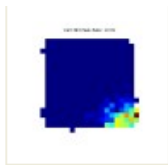

CA1\_393

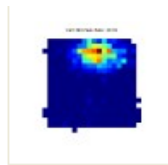

CA1\_394

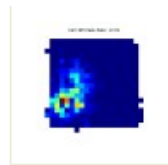

CA1\_395

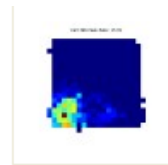

CA1\_396

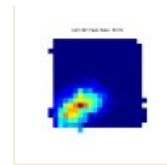

CA1\_397

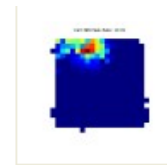

CA1\_398

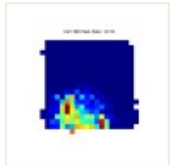

CA1\_399

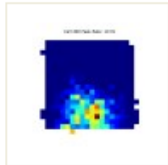

CA1\_400

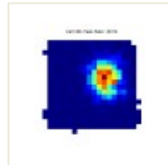

CA1\_401

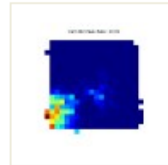

CA1\_402

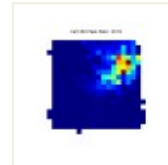

CA1\_403

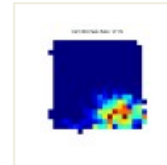

CA1\_404

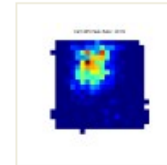

CA1\_405

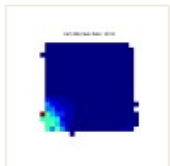

CA1\_406

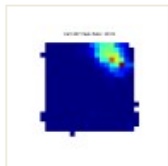

CA1\_407

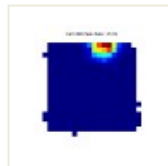

CA1\_408

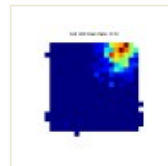

CA1\_409

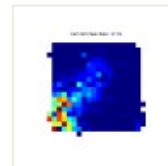

CA1\_410

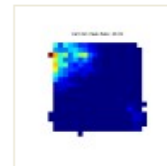

CA1\_411

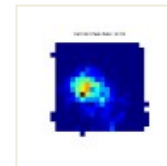

CA1\_412

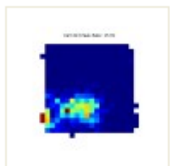

CA1\_413

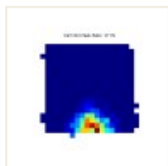

CA1\_414

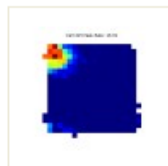

CA1\_415

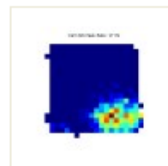

CA1\_416

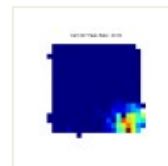

CA1\_417

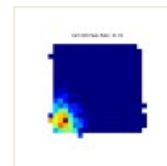

CA1\_418

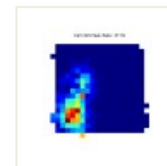

CA1\_419

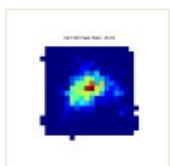

CA1\_420

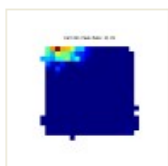

CA1\_421

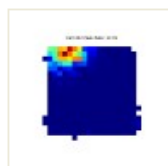

CA1\_422

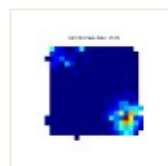

CA1\_423

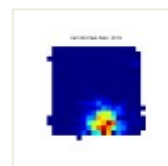

CA1\_424

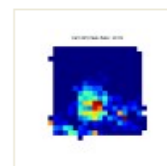

CA1\_425

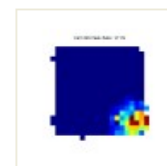

CA1\_426

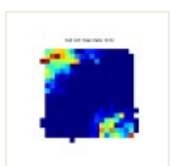

CA1\_427

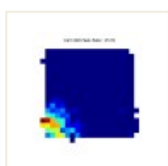

CA1\_428

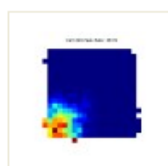

CA1\_429

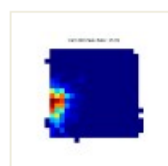

CA1\_430

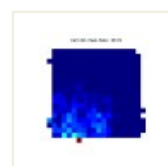

CA1\_431

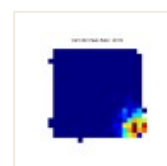

CA1\_432

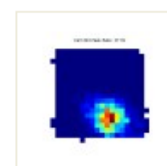

CA1\_433

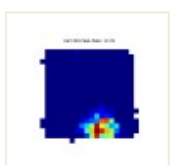

CA1\_434

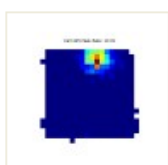

CA1\_435

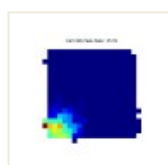

CA1\_436

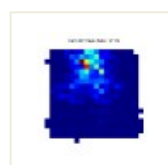

CA1\_437

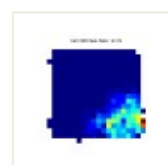

CA1\_438

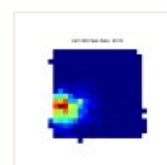

CA1\_439

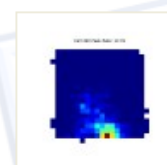

CA1\_440

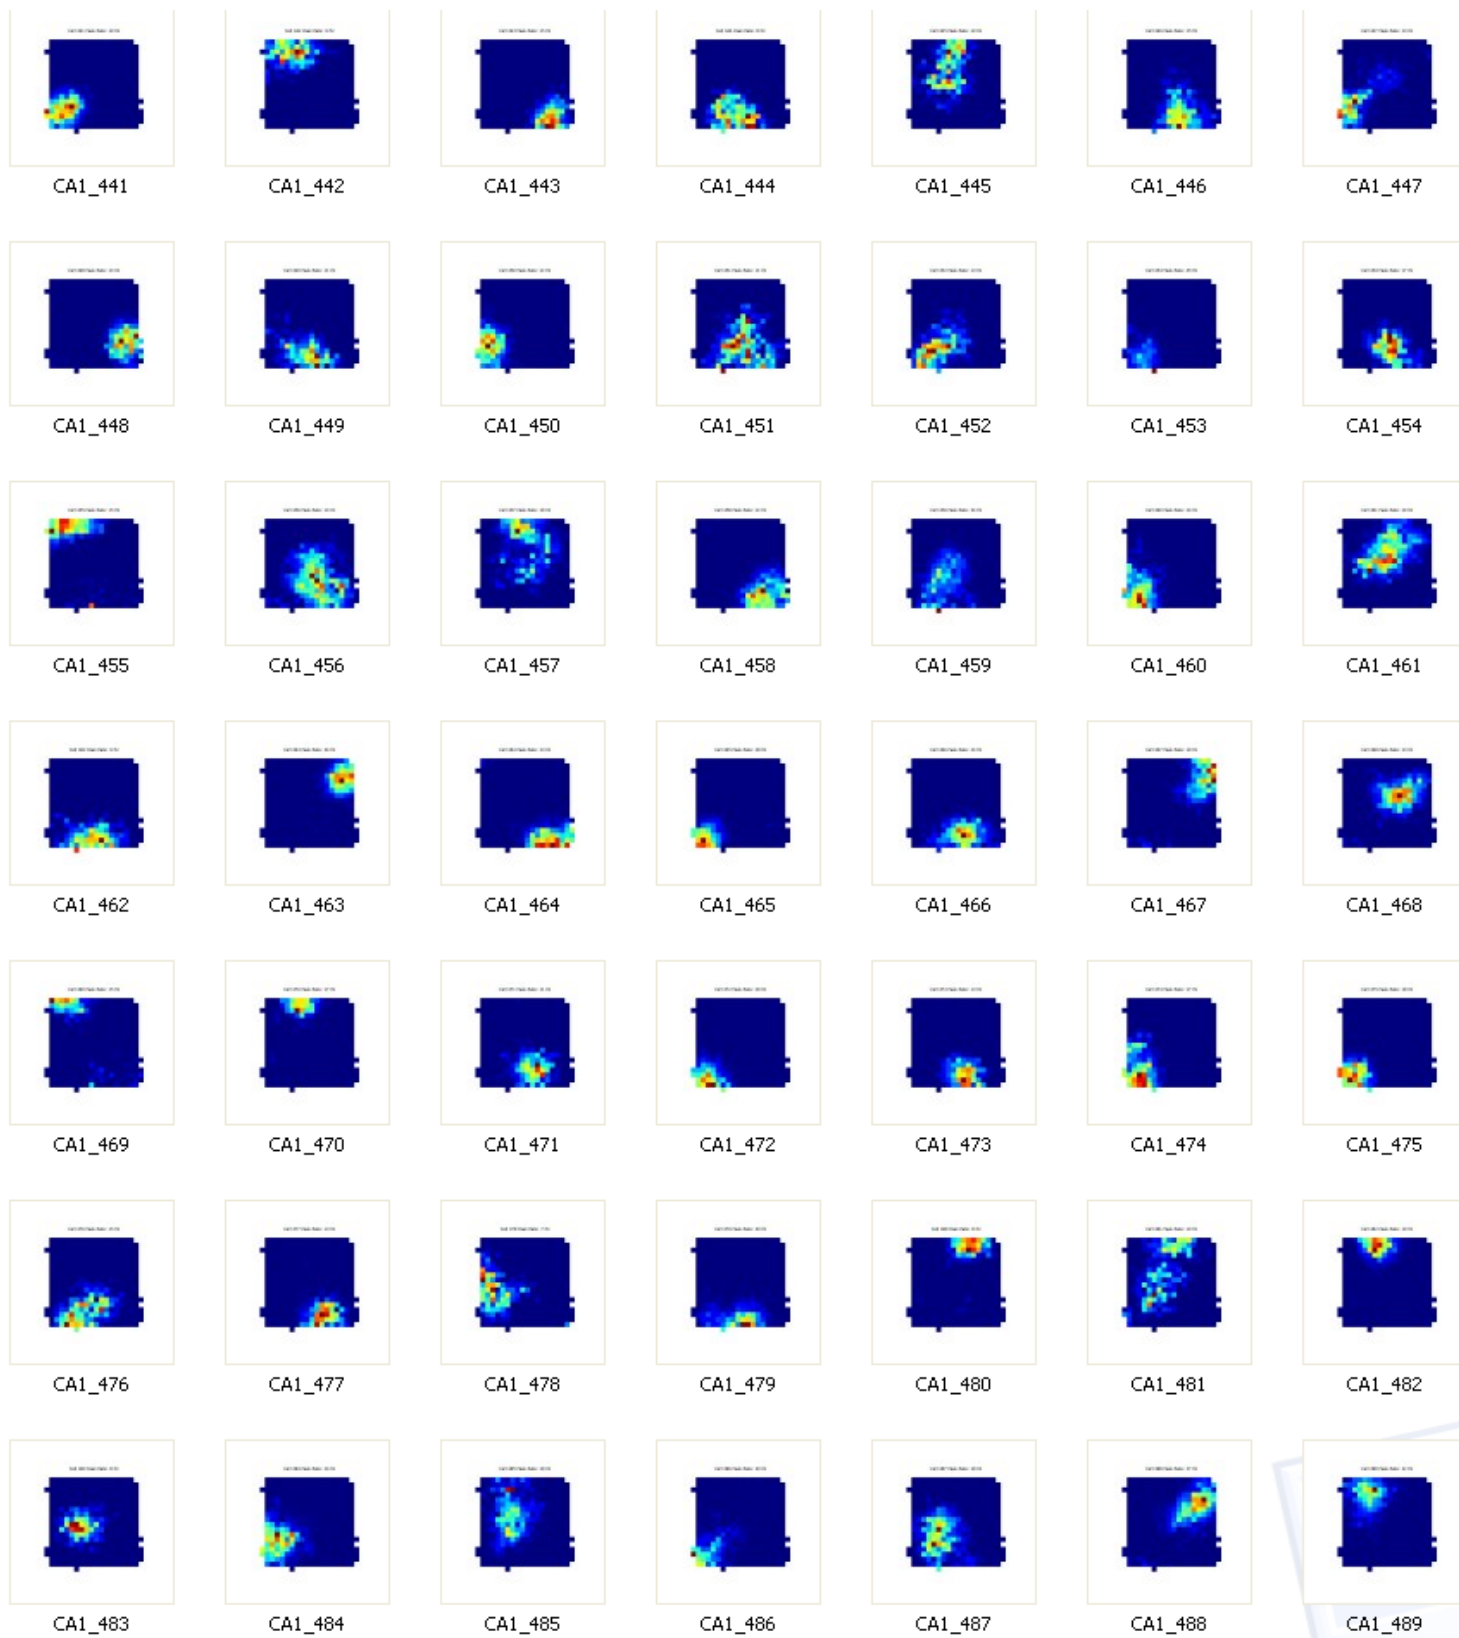

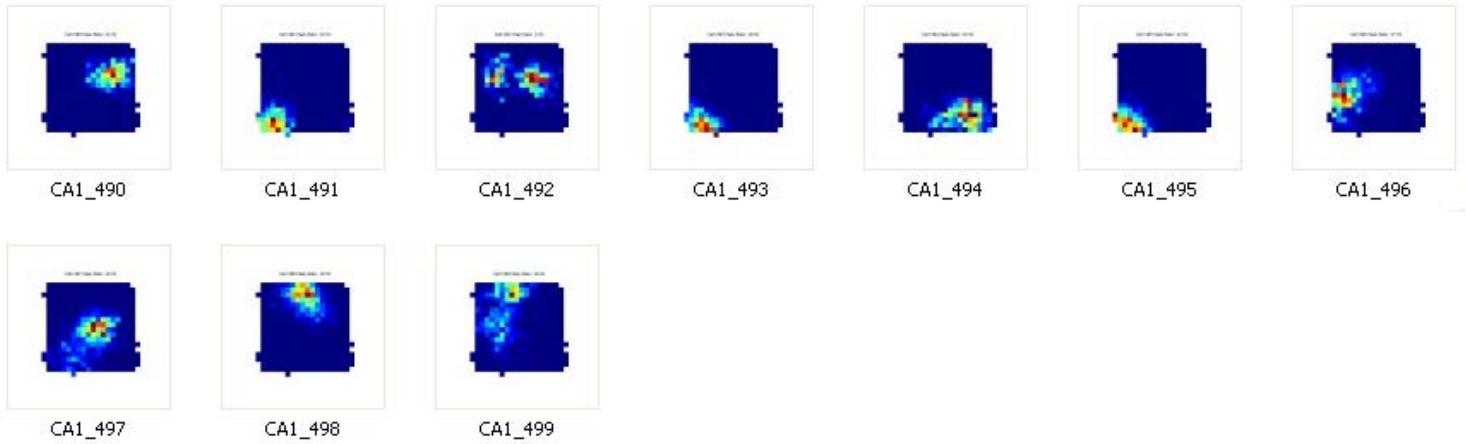

Supplementary Figure 5. Firing rate maps of all the “place cells” simulated as in Simulation 1 (see Suppl. Fig. 4) but with a different range of input grid spacing (70-93 cm instead of Simulation 1’s 30-53 cm). The resulting fields are larger, with fewer subfields, and with more irregular shape than those in Suppl. Fig. 4. We also ran a simulation with an intermediate range of grid spacing (50-73 cm). As expected, the resulting place fields were intermediate in size and shape (data not shown).

Supplementary Figure 6

**A**

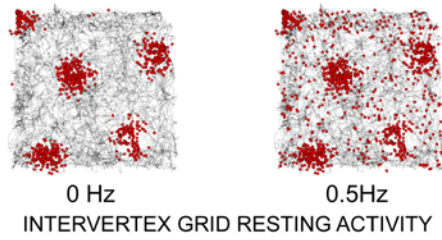

**B**

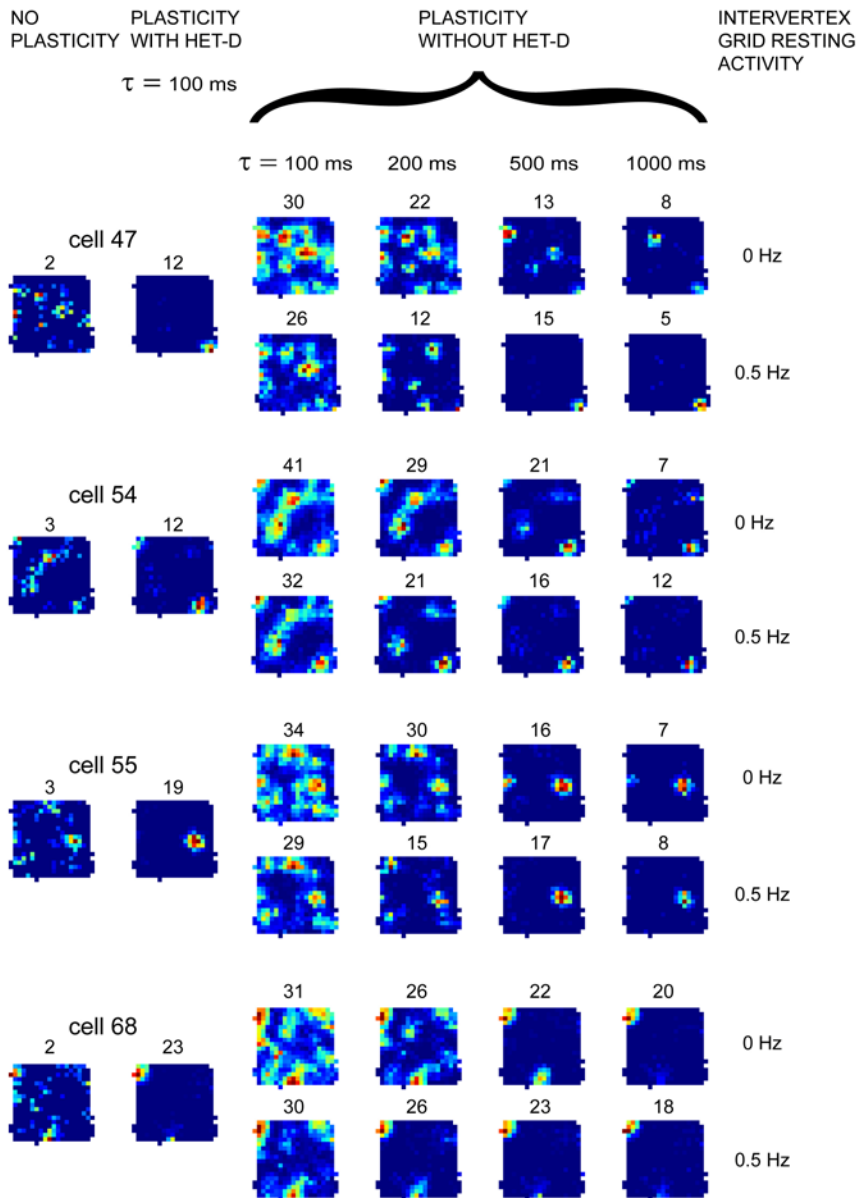

Supplementary Figure 6. Physiological alternatives to heterosynaptic depression. (A) Example of input grid cell with (right) and without (left) intervertex background activity. (B) Comparison

of rate maps of cells across different simulations. Rate maps in the first column were obtained from the simulation without synaptic plasticity. Rate maps in the second column were generated by the simulation with synaptic plasticity with heterosynaptic depression. Rate maps in the third to sixth columns were obtained from simulations with synaptic plasticity in which heterosynaptic depression was excluded, with increasing time constants ( $\tau$ ) used for the calculation of the presynaptic firing rate in the synaptic rule. The top and bottom rows of each pair show results for simulations in the absence or presence, respectively, of intervertex background activity in the grid inputs. Slower integration of presynaptic spikes compensates greatly for the lack of heterosynaptic depression, whereas the presence of intervertex grid background activity has a weaker contribution.

*Results for Supplementary Figure 6.* Recent experimental results at perforant path synapses suggest that presynaptic activity that is not directly controlled in *in vivo* experiments could disguise homosynaptic depression as heterosynaptic (Abraham et al., 2007). That is, the low-rate, spontaneous activity that typically occurs *in vivo* might provide a background level of activity of presynaptic cells that allows depression of these low-rate synapses using homosynaptic mechanisms (Abraham et al., 2007). A nonzero level of baseline activity in grid cells would cause the cells to fire at a low rate when the animal occupied a location in between the vertices of the grid. A longer time constant in the calculation of the momentary presynaptic firing rate would also provide a trace of presynaptic activity as the animal exits a vertex and enters an intervertex region. To test the interaction of these two possible mechanisms, we ran simulations in which the rule lacking heterosynaptic depression was used, with different time scales for the presynaptic firing rate decay, with or without spontaneous activity of grid cells in the intervertex spaces. For these simulations, we increased the value of  $\theta_d$  compared to the other simulation of heterosynaptic depression in the main text (Fig. 2D and 2E). The threshold  $\theta_d$  used in those simulations (0.05 Hz) was very low because it was important to demonstrate that even a minimal relaxation of the heterosynaptic property caused the failure of robust place-field formation in the model. Here we are in a logically opposite position, since we would like to test if the putative mechanisms can compensate for the lack of heterosynaptic depression, and so a higher threshold ( $\theta_d = 0.3$  Hz) was chosen. This value approaches the rate of stimulation at which it becomes possible to induce homosynaptic depression in *in vitro* protocols (Steele and Mauk, 1999; Dudek and Bear, 1992; Mulkey and Malenka, 1992). The value of  $\theta_p$  was the same as in Simulation 3 described in the main text ( $\theta_p = 5$  Hz, see Fig. 2 and Table 1), in which the lack of heterosynaptic depression had its most dramatic effect. We tried time constants for the ongoing calculation of the presynaptic firing rate in the range 100–1000 ms. When included, intervertex activity was implemented by keeping the firing-rate of the grid cell above 0.5 Hz at every location in the environment (Supplementary Fig. 6A). Column 1 of Supplementary Figure 6B shows the rate map for each example cell produced with no plasticity; column 2 shows the rate map produced by Eq. (2) (i.e., including heterosynaptic plasticity); and columns 3-6 show the rate maps produced without heterosynaptic plasticity ( $\theta_d = 0.3$  Hz) at 4 different time constants. For each cell, the first row of these 4 columns shows the rate maps produced with no spontaneous activity in between vertices and the second row shows the rate maps produced with an intervertex spontaneous activity of 0.5 Hz. Increasing the time constant of the presynaptic firing-rate decay improved the quality of place cells, moving from no spatial specificity due to the widespread runaway potentiation discussed in the previous section ( $\tau = 100$  ms) to a behavior that is comparable to the use of the intact rule of Eq. (2) ( $\tau = 500$ -1000 ms). The addition of intervertex spontaneous activity was less effective. However, intervertex activity did provide a

positive contribution in combination with longer time constants, as relatively shorter time constants with intervertex activity performed comparably to longer ones without intervertex activity.

#### Supplementary Reference List

1. **Abraham WC, Logan B, Wolff A and Benuskova L.** "Heterosynaptic" LTD in the dentate gyrus of anesthetized rat requires homosynaptic activity. *J Neurophysiol* 98: 1048-1051, 2007.
2. **Dudek SM and Bear MF.** Homosynaptic long-term depression in area CA1 of hippocampus and effects of N-methyl-D-aspartate receptor blockade. *Proc Natl Acad Sci U S A* 89: 4363-4367, 1992.
3. **Mulkey RM and Malenka RC.** Mechanisms underlying induction of homosynaptic long-term depression in area CA1 of the hippocampus. *Neuron* 9: 967-975, 1992.
4. **Skaggs WE, McNaughton BL, Wilson MA and Barnes CA.** Theta phase precession in hippocampal neuronal populations and the compression of temporal sequences. *Hippocampus* 6: 149-172, 1996.
5. **Steele PM and Mauk MD.** Inhibitory control of LTP and LTD: stability of synapse strength. *J Neurophysiol* 81: 1559-1566, 1999.
